# Supplementary material
Source: Royal Society of Chemistry journal article supplement (doi:10.1039/d5tc03868e)
Supplement: d5tc03868e1.pdf [file d5tc03868e1.pdf]

## Supporting Information

### Engineering the Amorphous-to-Crystalline Transformation, Fluorescence Enhancement and Reversible Switching of a Cyclobutane Derivative inside a Polymer Film

Supriya Kar<sup>a</sup>, Sonu Kumari<sup>b</sup>, Ram Singh Jat<sup>b</sup>, Ch. Suresh<sup>a</sup>, S. Rajagopala Reddy<sup>b</sup>,  
M. Bhanuchandra<sup>c</sup> and Chanchayya Gupta Chandaluri<sup>\*a</sup>

---

<sup>a</sup> *Supriya Kar, Ch. Suresh and Dr. Ch Gupta Chandaluri, Department of Humanities and Sciences, Chemistry Division, Indian Institute of Petroleum and Energy, Visakhapatnam, Andhra Pradesh-530003, India.*

<sup>b</sup> *Sonu Kumari, Ram Singh Jat, and Dr. S. Rajagopala Reddy, Department of Chemistry, Central University of Rajasthan, Bandarsindri, Rajasthan-305817, India.*

<sup>c</sup> *Dr. M. Bhanuchandra, Department of Chemistry, University of Delhi, Delhi-110007, India.*

**Table of Contents**

|                                                                                                                   |                |
|-------------------------------------------------------------------------------------------------------------------|----------------|
| <b>1. Single Crystal X-ray Structure of CB .....</b>                                                              | <b>S3-S5</b>   |
| <b>2. Spectroscopic and microscopic analysis for colloids.....</b>                                                | <b>S6</b>      |
| <b>3. Procedure for Quantum yield calculation.....</b>                                                            | <b>S7-S8</b>   |
| <b>4. Microscopic analysis, Quantum yield values and images under UV 365nm lamp of drop<br/>casted films.....</b> | <b>S9-S13</b>  |
| <b>5. Simulated x-ray and powder x-ray diffraction pattern .....</b>                                              | <b>S14</b>     |
| <b>6. Confocal laser scanning microscopic analysis.....</b>                                                       | <b>S15-S16</b> |
| <b>7. Amorphous to crystalline transformation using other polymers.....</b>                                       | <b>S17</b>     |
| <b>8. Chromaticity diagram.....</b>                                                                               | <b>S18</b>     |
| <b>9. Computational Data .....</b>                                                                                | <b>S19-S36</b> |
| <b>10. References.....</b>                                                                                        | <b>S36</b>     |

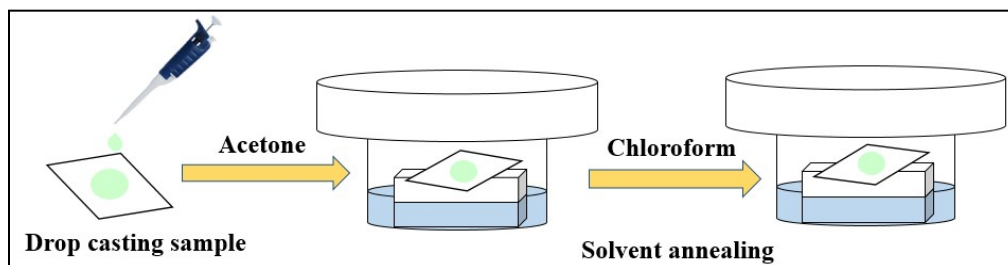

**Figure S1:** Schematic diagram of *vapo-chromic* process

## 1. Single Crystal X-ray Structure of CB:

**Table S1:** Crystal data and structure refinement for CB.

|                                                                           |                                                                  |
|---------------------------------------------------------------------------|------------------------------------------------------------------|
| <b>Empirical formula</b>                                                  | $C_{36}H_{28}N_4$                                                |
| <b>Formula weight</b>                                                     | 516.62                                                           |
| <b>Temperature</b>                                                        | 293(2)                                                           |
| <b>Crystal system, space group</b>                                        | Monoclinic, $C2/c$                                               |
| <b>Unit cell dimensions</b>                                               | $a = 21.151(4) \text{ \AA}$ $\alpha = 90^\circ$                  |
|                                                                           | $b = 11.6110(18) \text{ \AA}$ $\beta = 105.710(18)^\circ$        |
|                                                                           | $c = 11.946(2) \text{ \AA}$ $\gamma = 90^\circ$                  |
| <b>Volume</b>                                                             | $2824.0(8) \text{ \AA}^3$                                        |
| <b>Z</b>                                                                  | 4                                                                |
| <b><math>\rho_{\text{calc.}}</math> / <math>\text{g cm}^{-3}</math></b>   | 1.215                                                            |
| <b><math>\mu</math> / <math>\text{mm}^{-1}</math></b>                     | 0.072                                                            |
| <b>Temperature/K</b>                                                      | 293                                                              |
| <b><math>2\theta</math> range for data collection/<math>^\circ</math></b> | 5.718 to 52.744                                                  |
| <b>Reflections collected</b>                                              | 5608                                                             |
| <b>Independent reflections</b>                                            | 2882 [ $R_{\text{int}} = 0.0864$ , $R_{\text{sigma}} = 0.1947$ ] |
| <b>Data/restraints/parameters</b>                                         | 2882/0/182                                                       |
| <b>Goodness-of-fit</b>                                                    | 0.868                                                            |
| <b>Final R indexes [<math>I \geq 2\sigma(I)</math>]</b>                   | $R_1 = 0.0625$ , $wR_2 = 0.0709$                                 |
| <b>Largest diff. peak and hole / <math>e\text{\AA}^{-3}</math></b>        | 0.14/-0.18                                                       |

(a)

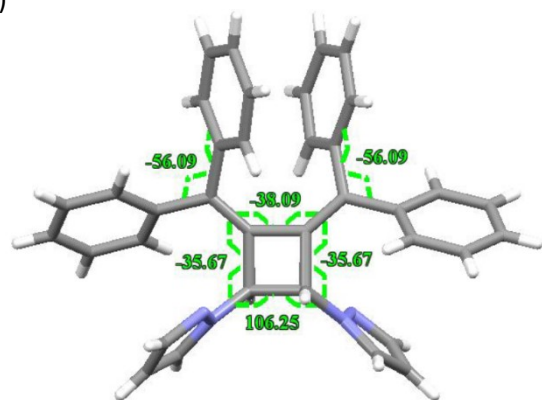

(b)

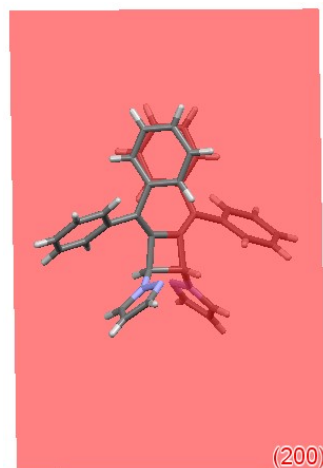

(c)

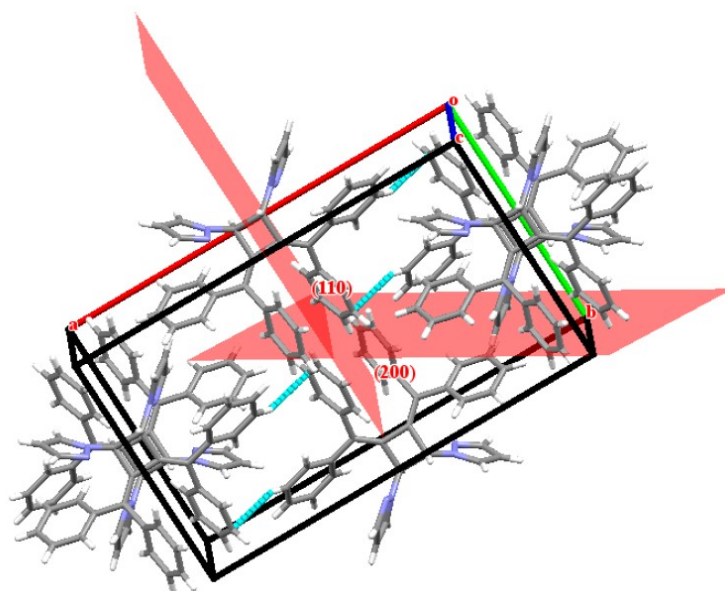

(d)

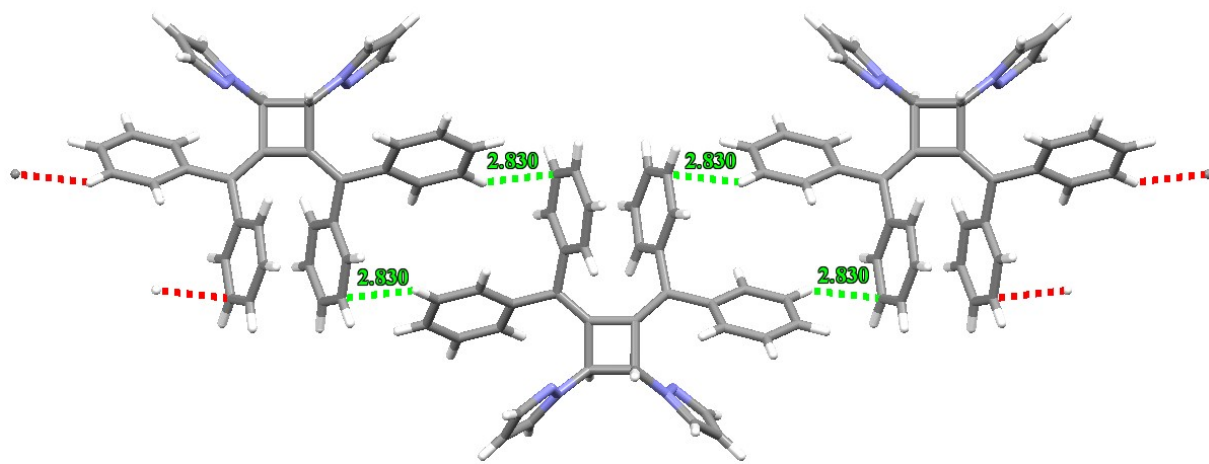

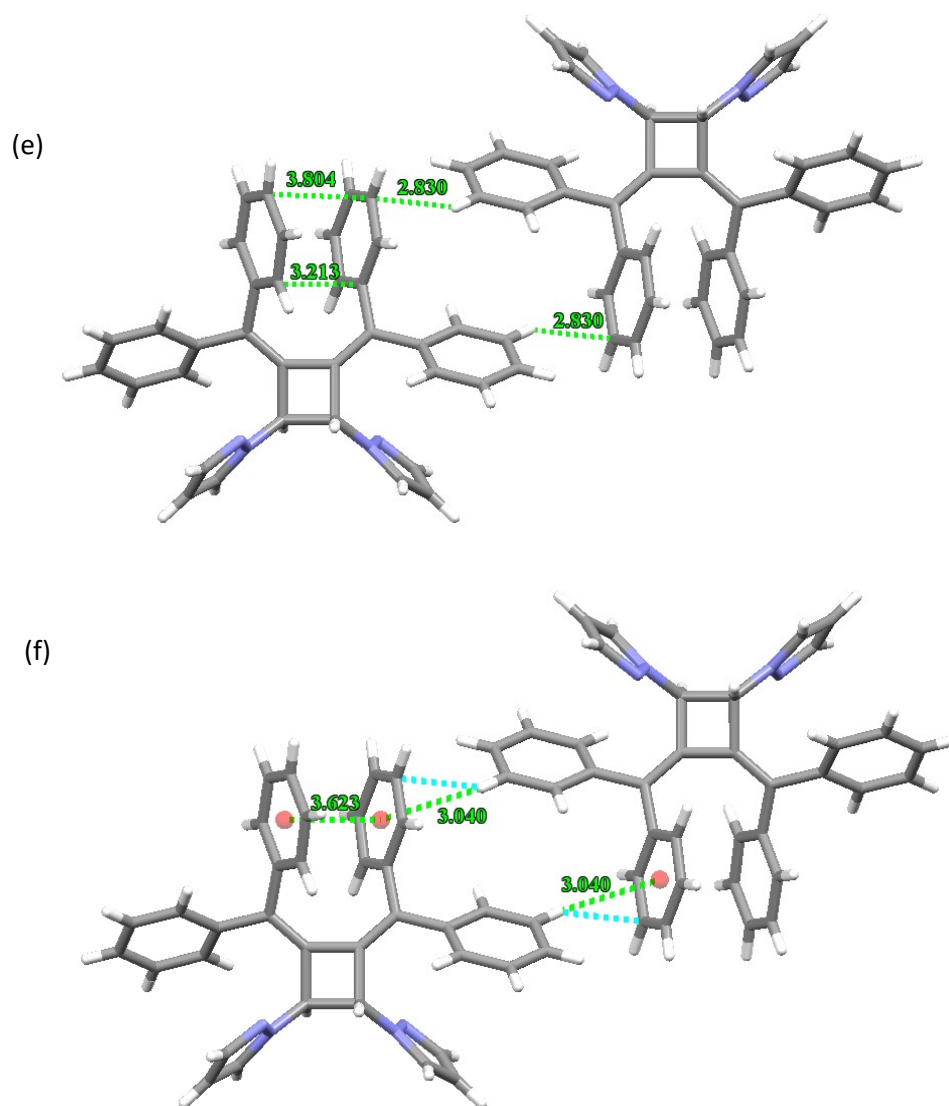

**Figure S2:** (a) Torsion angles of CB (b) plane (200) intersecting the monomer from the center (c) molecular packing along with planes (d) C-H- $\Pi$  (cyan broken line) short intermolecular contacts leading to layer structures (e) intramolecular distances between the benzene rings (f)  $\Pi$ - $\Pi$  and C-H- $\Pi$  intermolecular distance between neighboring molecule. C (black) and N (blue) atoms are indicated.

## 2. Spectroscopic and microscopic analysis for colloids

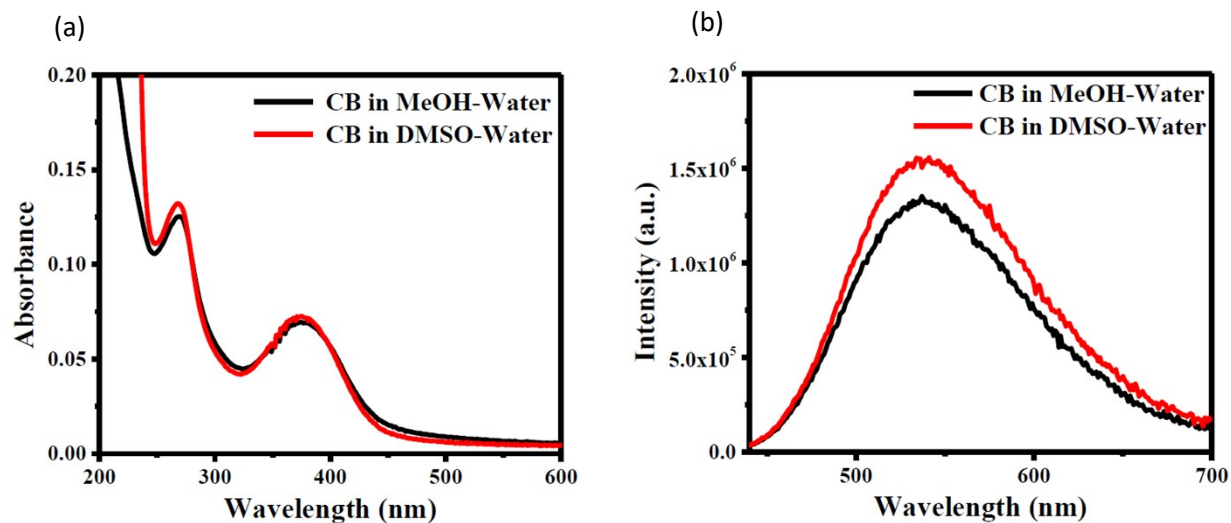

**Figure S3:** (a) Electronic absorption spectra and (b) fluorescence emission spectra of CB colloids prepared in Methanol-Water and DMSO-Water system.

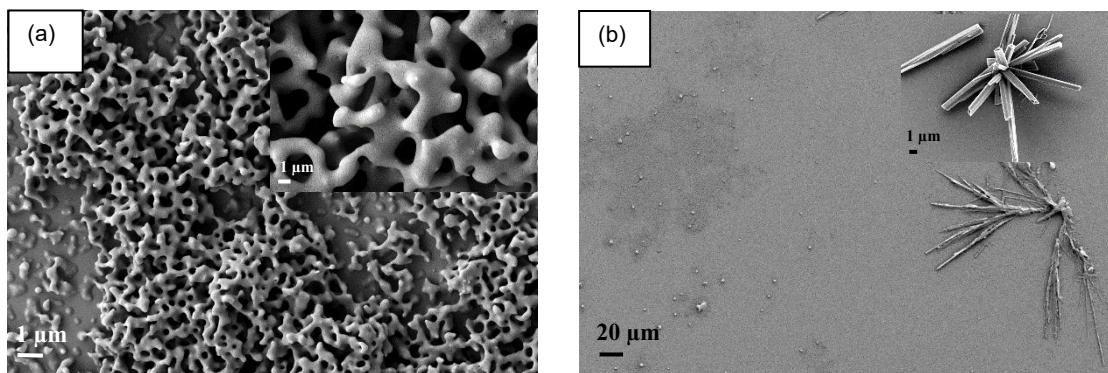

**Figure S4:** SEM images of (a) CB- CH<sub>3</sub>OH colloid (b) CB-DMSO colloid

### 3. Procedure for Quantum yield calculation

Quantum yield of solution was measured using Coumarin 102 as a reference ( $\phi_f = 73\%$ ,  $\lambda_{ex} = 373$  nm, Ethanol) and for colloid was measured using Quinine sulphate ( $\phi_f = 54.6\%$ ,  $\lambda_{ex} = 350$  nm, 1N H<sub>2</sub>SO<sub>4</sub>). For this, sample solution and reference solution were prepared with nearly similar absorbance. The sample was placed on a solid sample holder at the right angle geometry for the recording of spectra. The following equation used for the calculation of quantum yield;

$$\Phi_f = \Phi_{f,s} \times \frac{F_x}{F_s} \times \frac{f_s}{f_x} \times \frac{n_x^2}{n_s^2} \dots\dots\dots (\text{Eqn. 1})$$

$$f = 1 - 10^{-A_{\lambda_{ex}}} \dots\dots\dots (\text{Eqn. 2})$$

Where, n, F, and  $\Phi$  are the refractive index, integral fluorescence, and fluorescence quantum yield, respectively, where the subscripts s and x refer to the standard and sample respectively.  $\lambda_{ex}$ ,  $\epsilon$ , and A, denote the excitation wavelength, molar extinction coefficient (L mol<sup>-1</sup> cm<sup>-1</sup>), and absorbance, respectively.

| S.No. | Sample                                  | Absorption max<br>(nm) | Emission max<br>(nm) | Q.Y(%) |
|-------|-----------------------------------------|------------------------|----------------------|--------|
| 1     | CB in CH <sub>3</sub> OH solution       | 367                    | 591                  | 0.15   |
| 2     | CB in CH <sub>3</sub> OH –water colloid | 375                    | 538                  | 4.5    |
| 3     | Solid CB                                | ~400 (broad)           | 510                  | 70     |

**Table S2:** Absorption max ( $\lambda_{max}$ ), emission max ( $\lambda_{emmax}$ ) and quantum yield for CB in CH<sub>3</sub>OH solution, CB in CH<sub>3</sub>OH-water colloid and solid CB

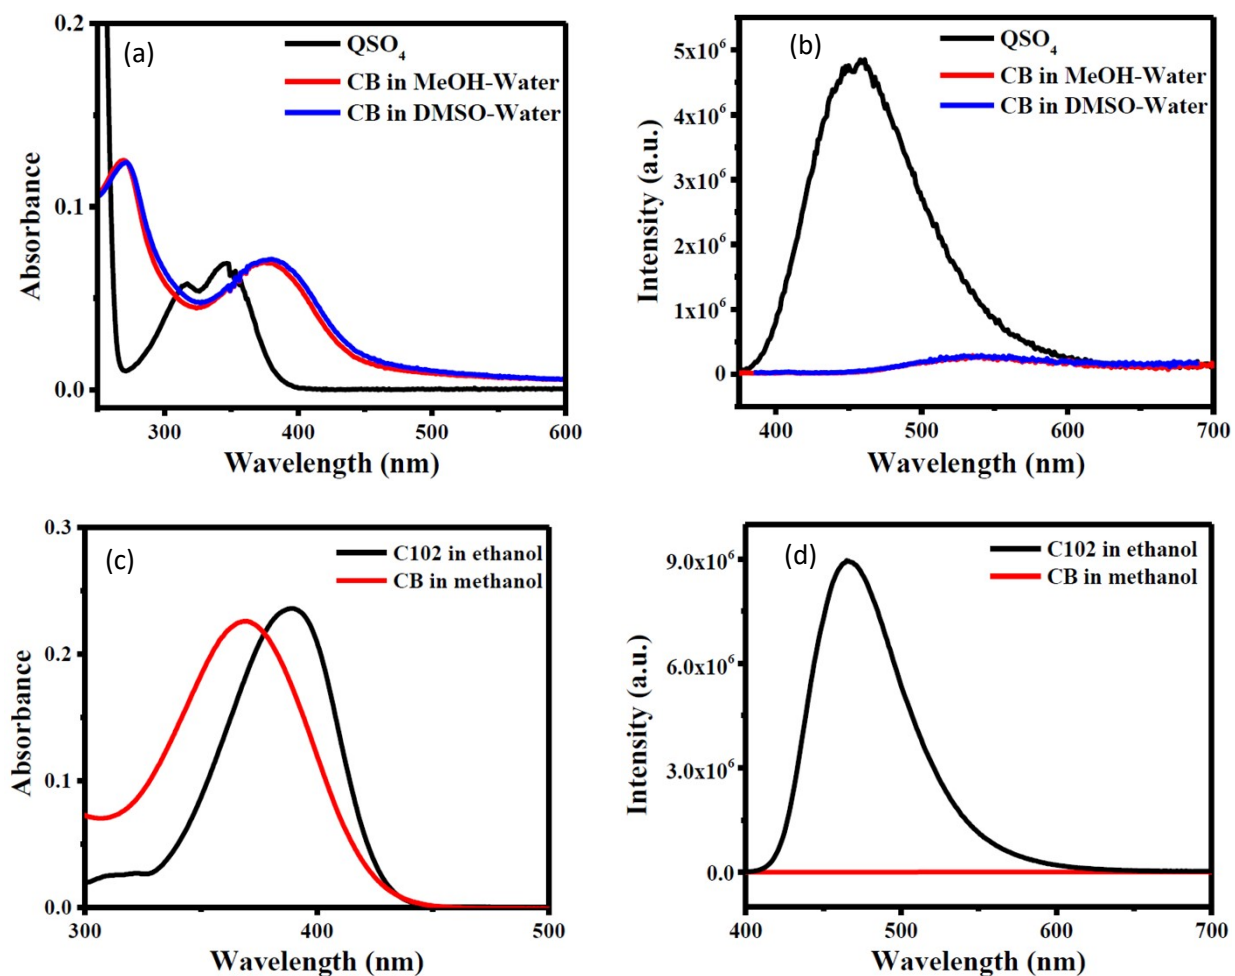

**Figure S5:** (a) Absorption and (b) emission spectra of CB in methanol and CB in DMSO measured using quinine sulphate as a reference (c) absorption and (d) emission spectra of CB in methanol measured using coumarin 102 as a reference

#### 4. Microscopic analysis, Quantum yield values and images under UV 365nm lamp of drop casted films

Drop casted CB-THF solution onto a glass slide results in the formation of a layer on the substrate. SEM analysis reveals the cracks in the film formed at room temperature (Figure S6) and domains are observed in the film fabricated at 100°C (Figure S7). The film fabricated under vacuum exhibits uniform morphology as shown in the Figure S8. Films prepared using THF as solvent does not have any nano/micro particles.

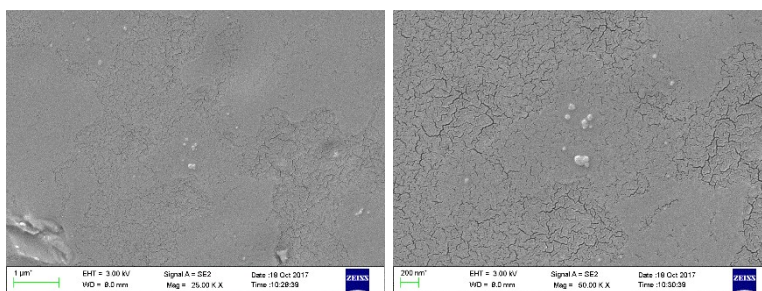

**Figure S6:** SEM images of films obtained by drop casting CB-THF solution followed by air dry.

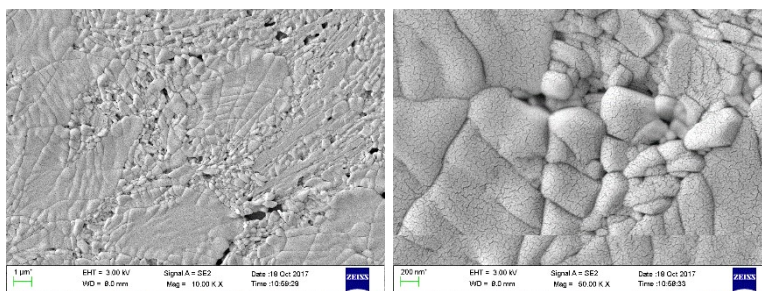

**Figure S7:** SEM images of films obtained by drop casting CB-THF solution followed by drying at 100°C

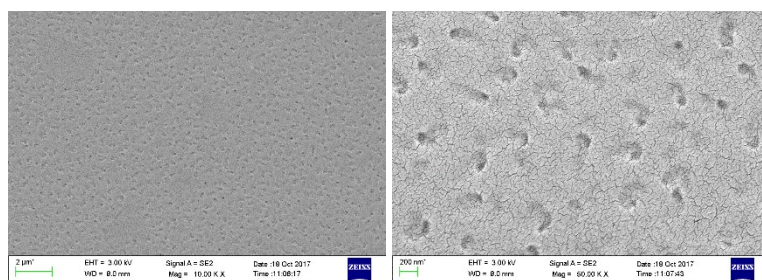

**Figure S8:** SEM images of films obtained by drop casting CB-THF solution followed by drying under vacuum

Drop casted CB-methanol solution onto a glass slide results in the formation of a spherical particles at room temperature (Figure S9) and connected particles were observed in the film fabricated at 100°C (Figure S10). The film fabricated under vacuum exhibits morphology of networking large number of particles as shown in the Figure S11.

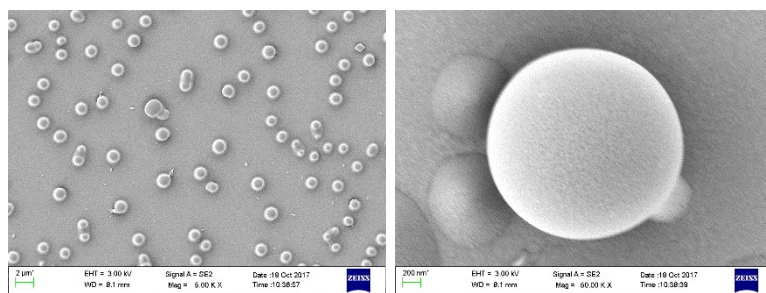

**Figure S9:** SEM images of films obtained by drop casting CB-methanol solution followed by air dry.

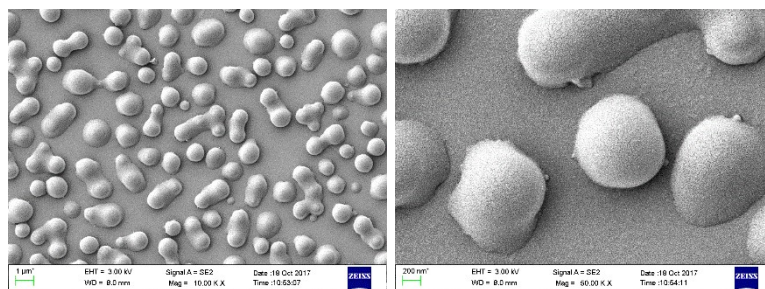

**Figure S10:** SEM images of films obtained by drop casting CB-methanol solution followed by air dry at 100°C.

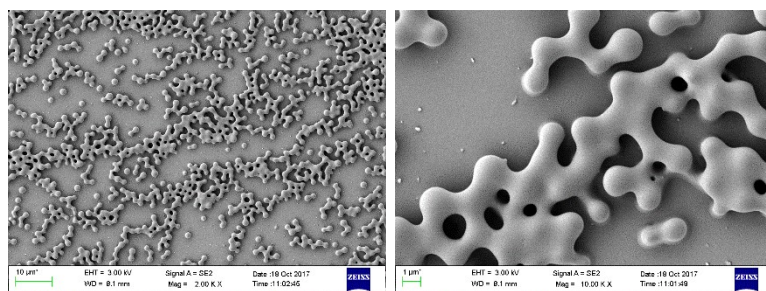

**Figure S11:** SEM images of films obtained by drop casting CB-methanol solution followed by vacuum.

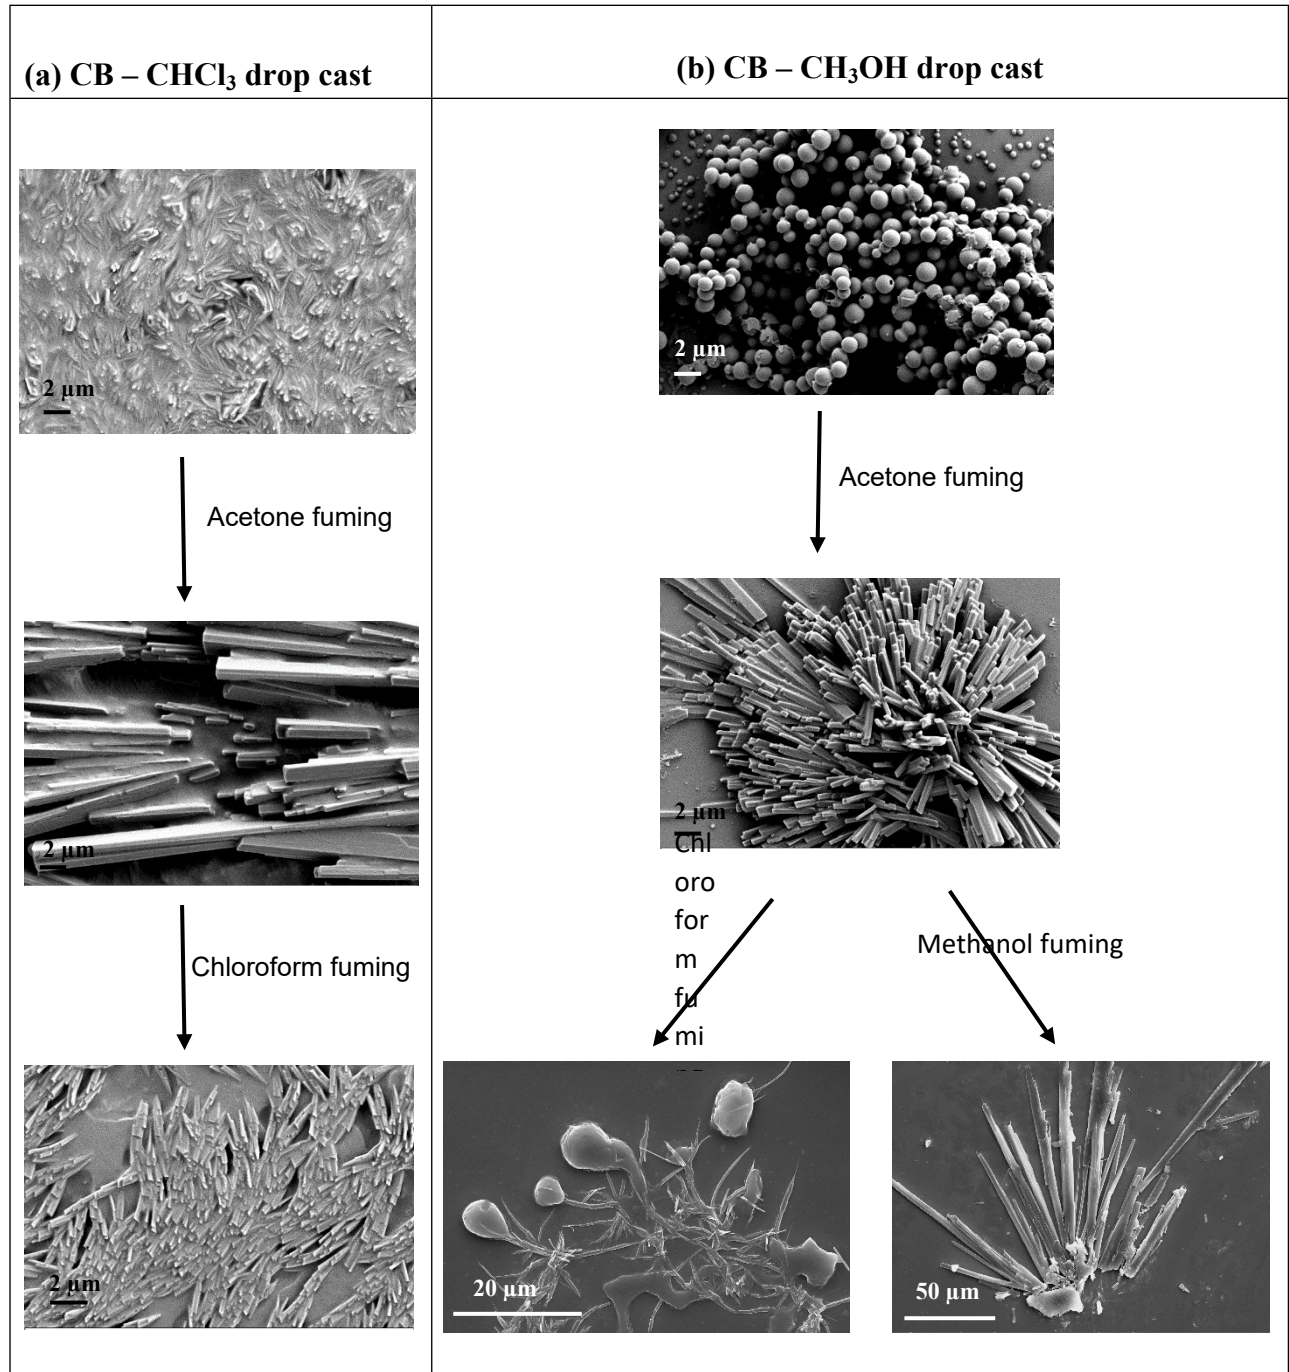

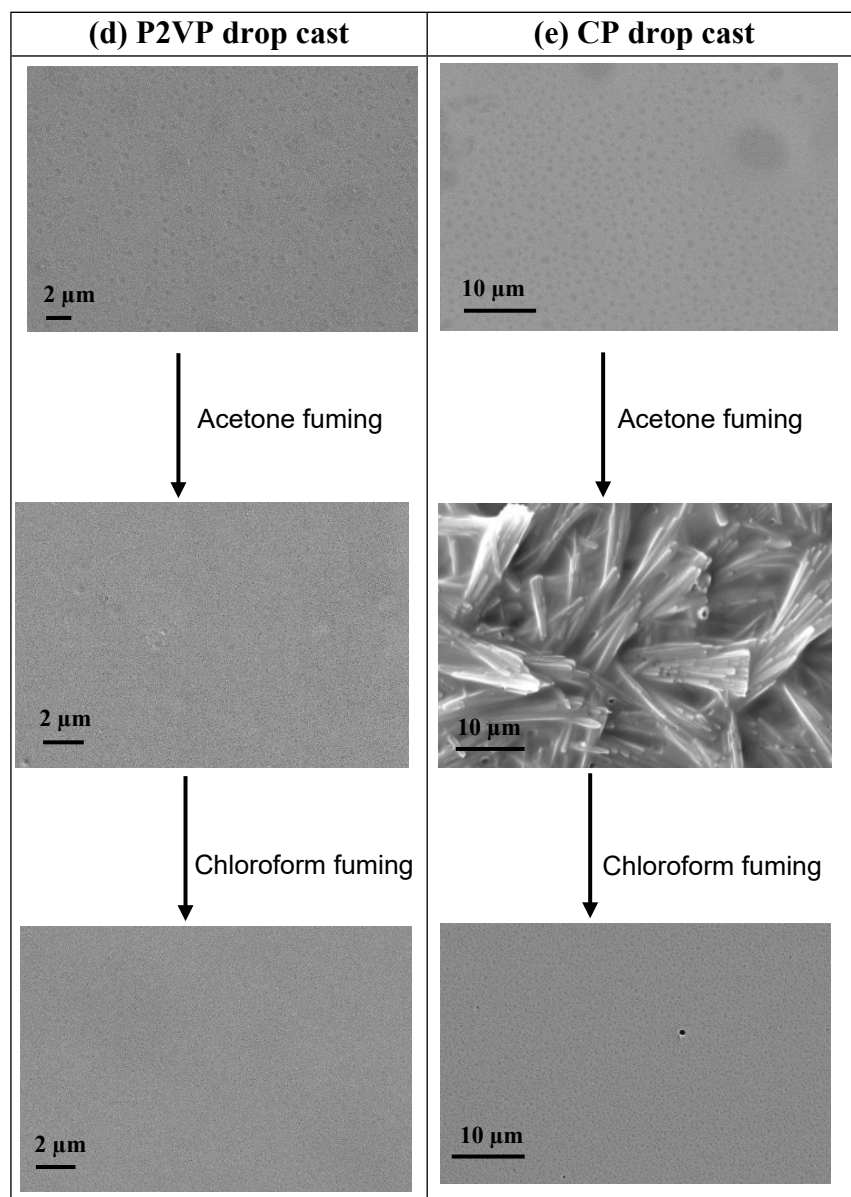

**Figure S12:** SEM images of drop cast before and after fuming of CB-chloroform, CB-CH<sub>3</sub>OH,

| S. No. | Sample      | $\lambda_{\max}$ (nm) | $\lambda_{\text{em max}}$ (nm) | Q. Y. (%) |
|--------|-------------|-----------------------|--------------------------------|-----------|
|        | P2VP and CP |                       |                                |           |

P2VP and CP

**Table S3:** Absorption max, emission max and quantum yield for CP, CPA and CPAC

|          |      |             |     |    |
|----------|------|-------------|-----|----|
| <b>1</b> | CP   | 410 (broad) | 528 | 12 |
| <b>2</b> | CPA  | 370 (broad) | 504 | 19 |
| <b>3</b> | CPAC | 410 (broad) | 528 | 14 |

Four thin films were fabricated using drop-casting CB methanol solution onto a glass substrate. These films were subsequently exposed to acetone vapors followed by either chloroform (Table S4) or methanol (Table S5) vapors. In both cases, the crystalline to amorphous conversion was

|                                                                          | <b>1</b>                                                                           | <b>2</b>                                                                           | <b>3</b>                                                                           | <b>4</b>                                                                             |
|--------------------------------------------------------------------------|------------------------------------------------------------------------------------|------------------------------------------------------------------------------------|------------------------------------------------------------------------------------|--------------------------------------------------------------------------------------|
| CB-CH <sub>3</sub> OH<br>drop cast<br><b>(Amorphous)</b>                 |   |   |   |   |
| Acetone fuming<br><b>(Crystalline)</b>                                   |   |   |   |   |
| Chloroform<br>fuming<br><b>(both<br/>amorphous and<br/>crystalline )</b> |  |  |  |  |

incomplete, as the films exhibited strong fluorescence under UV 365nm lamp compared to the initial amorphous

films.

**Table S4:** Images of thin films of CB-CH<sub>3</sub>OH and after solvent (acetone followed by chloroform) fuming under 365 nm lamp

**Table  
S5:**

Images of thin films of CB-CH<sub>3</sub>OH and after solvent (acetone followed by methanol) fuming under 365 nm lamp

|                                                              | 1 | 2 | 3 | 4 |
|--------------------------------------------------------------|---|---|---|---|
| CB-CH <sub>3</sub> OH<br>drop cast<br>(Amorphous)            |   |   |   |   |
| Acetone<br>fuming<br>(Crystalline)                           |   |   |   |   |
| Methanol<br>fuming<br>(both<br>amorphous and<br>crystalline) |   |   |   |   |

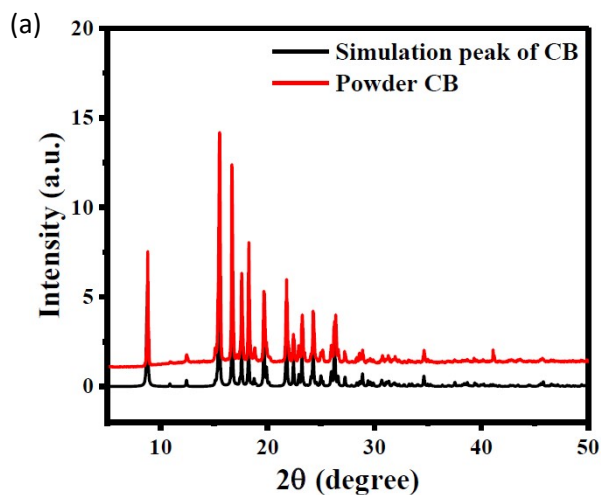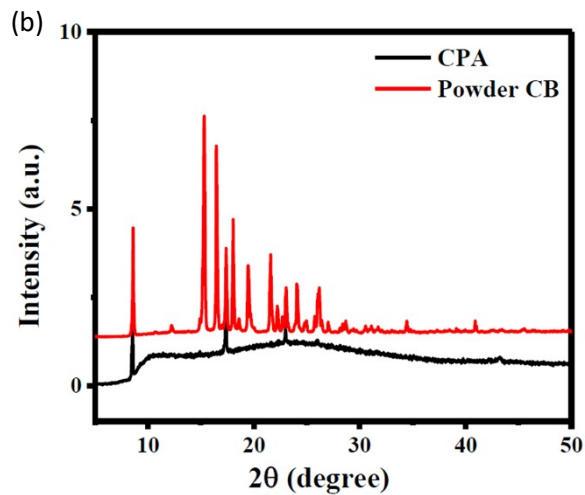

## 5. Simulated x-ray and powder x-ray diffraction pattern

The x-ray diffraction pattern of the CB powder sample was recorded using Bruker D8 Advance A25 X-ray diffractometer with Cu K $\alpha$  radiation ( $\lambda = 1.54060 \text{ \AA}$ ) at 40 kV and 40 mA. The patterns were simulated based on the single crystal structure determined at room temperature, as shown below.

**Figure S13:** XRD pattern of powdered CB (b) powdered C CPA film with Miller indices.

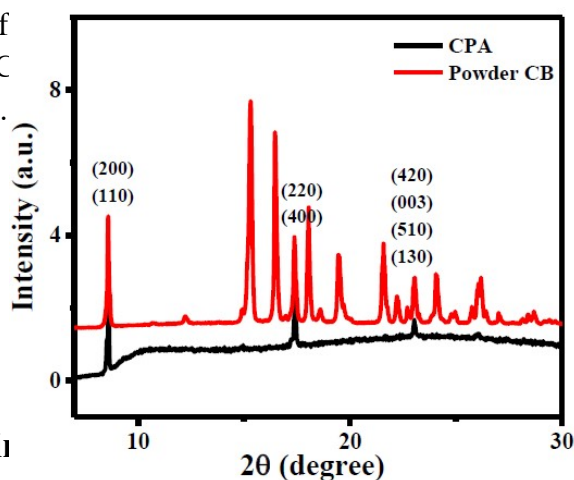

Crystal XRD data and the (c) diffraction peaks of

## 6. Confocal laser scanning

**Table S6:** Scanning electron microscope (SEM) images, confocal laser scanning microscope images (CLSM), average lifetime images, histogram of CP drop cast film, film after fuming, CB in chloroform drop cast, CB in methanol drop cast and solid CB

| S.No. | Sample description | SEM image | CLSM image | Avg lifetime image | Histogram |
|-------|--------------------|-----------|------------|--------------------|-----------|
| 1     | CP                 |           |            |                    |           |

|   |                                    |                                                                                     |                                                                                     |                                                                                      |                                                                                       |
|---|------------------------------------|-------------------------------------------------------------------------------------|-------------------------------------------------------------------------------------|--------------------------------------------------------------------------------------|---------------------------------------------------------------------------------------|
| 6 | Solid CB                           | ----                                                                                | 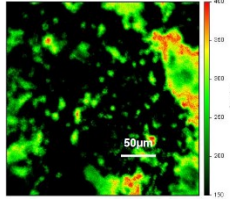   |    |    |
| 2 | CPA                                |    |    |    |    |
| 3 | CPAC                               |   |   |   |   |
| 4 | CB in CHCl <sub>3</sub> drop cast  |  |  |  |  |
| 5 | CB in CH <sub>3</sub> OH drop cast |  |  |  |  |

**Table S7:** Details of the excited state lifetime of CP drop cast film, film after fuming, CB in chloroform, methanol drop cast and solid CB. (Data obtained from a single point in the film and the

data fitted with single or multiple exponential decays based on the  $\chi^2$  value using VistaVision software)

| Sample                          | $\tau_1$ (ns) | $\alpha_1$ | $\tau_2$ (ns) | $\alpha_2$ | $\tau_{aw}$ (ns) | $\tau_{iw}$ (ns) | $\chi^2$ |
|---------------------------------|---------------|------------|---------------|------------|------------------|------------------|----------|
| CP                              | 0.98          | 0.75       | 2.44          | 0.25       | 1.4              | 1.6              | 1.0      |
| CPA                             | 3.85          | 1.0        | –             | –          | 3.9              | 3.9              | 1.01     |
| CPAC                            | 0.94          | 0.69       | 2.35          | 0.31       | 1.4              | 1.7              | 1.10     |
| CB in $\text{CHCl}_3$ drop cast | 3.45          | 1.0        | –             | –          | 3.5              | 3.5              | 1.10     |
| CB in methanol drop cast        | 0.84          | 0.85       | 2.16          | 0.15       | 1.0              | 1.3              | 1.0      |
| CB solid powder                 | 4.17          | 1.0        | –             | –          | 4.2              | 4.2              | 1.08     |

The average lifetime ( $\tau$ ) is calculated using the following expressions:

$$\tau_{aw} = \alpha_1\tau_1 + \alpha_2\tau_2$$

$$\tau_{iw} = \frac{\alpha_1\tau_1^2 + \alpha_2\tau_2^2}{\alpha_1\tau_1 + \alpha_2\tau_2}$$

Where  $\tau_{aw}$  is Amplitude-Weighted Lifetime and  $\tau_{iw}$  is Intensity-Weighted Lifetime,  $\alpha_1$  and  $\alpha_2$  are pre-exponential factors,  $\tau_1$  and  $\tau_2$  are lifetime components.

**Table S8:** Details of the excited state average lifetime of the images obtained from CP drop cast film, film after fuming, CB in chloroform, methanol drop cast and solid CB. (Data collected from the total image)

| Sample                          | $\tau_1$ (ns) | $\alpha_1$  | $\tau_2$ (ns) | $\alpha_2$  | $\tau_{av}$ (ns) |
|---------------------------------|---------------|-------------|---------------|-------------|------------------|
| CP                              | 0.7- 1.2      | 0.6 – 0.85  | 1.8 – 2.8     | 0.25 – 0.4  | 1.2 – 1.4        |
| CPA                             | 3.4 – 4.0     | 1.0         | –             | –           | 3.4 – 4.0        |
| CPAC                            | 0.6 – 1.4     | 0.55 – 0.90 | 1.8 – 2.8     | 0.10 – 0.45 | 1.3 – 1.65       |
| CB in $\text{CHCl}_3$ drop cast | 2.8 – 3.5     | 1.0         | –             | –           | 2.8 – 3.5        |
| CB in methanol drop cast        | 0.6 – 1.0     | 0.80 – 0.95 | 1.7 – 2.4     | 0.05 – 0.20 | 0.95 – 1.15      |
| CB solid powder                 | 3.7 - 4.30    | 1.0         | –             | –           | 3.7 - 4.30       |

## 7. Amorphous to crystalline transformation using other polymers

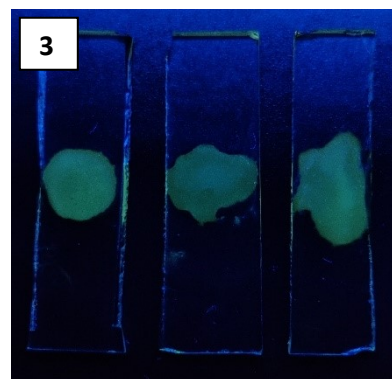

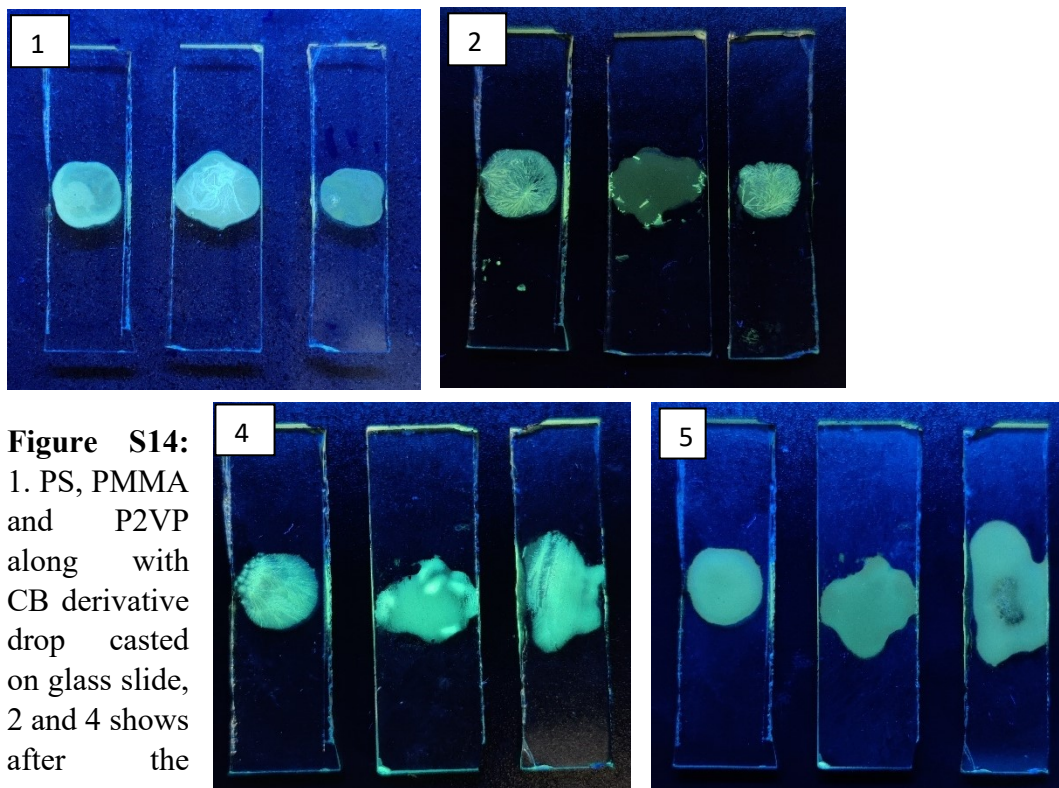

**Figure S14:**

1. PS, PMMA and P2VP along with CB derivative drop casted on glass slide, 2 and 4 shows after the acetone annealing, 3 and 5 shows after chloroform annealing

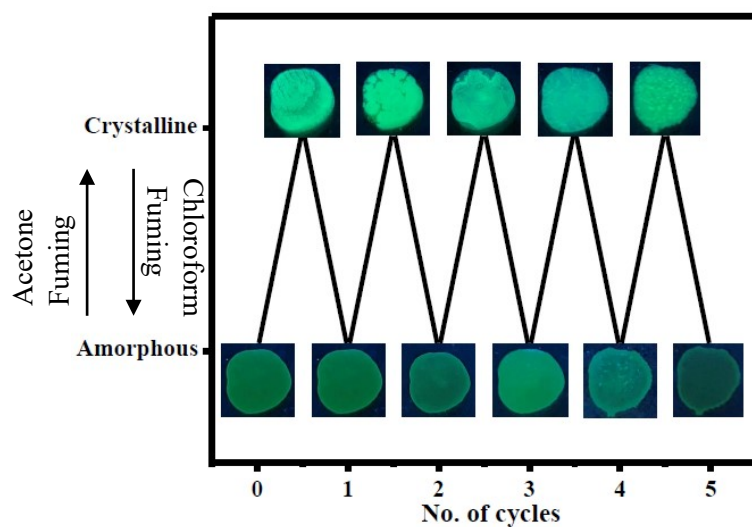

**Figure S15:** Images of thin films of CP (amorphous to crystalline transformations) under 365 nm lamp for five cycles

## 8. Chromaticity diagram

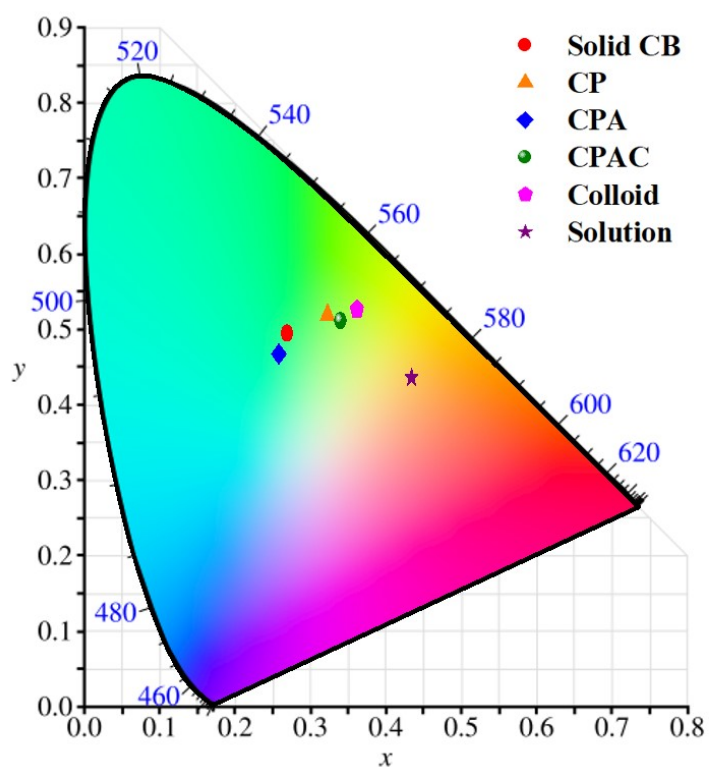

**Figure S16:** Chromaticity diagram of solid CB, CP thin film and after solvent fuming, CB-methanol/water colloid and CB in methanol solution.

## 9. Computational Data

To understand the steady state spectroscopy, we performed computational chemistry calculations. The ground state geometry of CB is optimized using density functional B3LYP1-5<sup>1-5</sup> and the basis set 6-31g(d,p).<sup>6-9</sup> The geometry is stable on the account of all positive frequencies. Solvent effects are incorporated by using the CPCM model.<sup>10-16</sup> The vertical excited states are calculated at TD-DFT level. To understand the Stoke shift, we have performed the optimization of the S<sub>1</sub> state. To mimic the solid state environment, we have taken the geometry of CB from the crystal structure and used it without performing geometry optimization. All the calculations are performed using the ORCA electronic structure program package.<sup>17-20</sup> Natural transition orbital analysis based on TD-DFT one-particle density matrix is performed to characterize the excited states as local excitation (LE) and charge transfer states (CT) using Theodore program package.<sup>21</sup> For this purpose, CB was fragmented into diphenyl methylene, cyclobutane and pyrazole. Based on the natural transition orbitals, excitations of S<sub>1</sub>, S<sub>2</sub> and S<sub>3</sub> are decomposed to local excitation in diphenyl methylene (LDP), local excitation in cyclobutane (LCB), local excitation in pyrazole (LP) and charge transfer excitations between these fragments. CT1 is the charge transfer between the fragments cyclobutane to diphenyl methylene. CT2 is the charge transfer state between diphenyl methylene to pyrazole. CT3 is the charge transfer state between cyclobutane to pyrazole.

Table S9 presents the first 5 excited states of CB in methanol solvent, vacuum and solid environment. The wavelength (nm), oscillator strength (dimensionless) and the type of electronic excitation are provided. The S<sub>1</sub> state is located at 387 nm and is a bright state (bright states are the electronic states with considerable oscillator strength). The excitation energy is under estimated by the TD-DFT by ~30 nm. The adiabatic excitation energy obtained by optimizing the S<sub>1</sub> state by TD-DFT is 578 nm, resulting in a Stoke shift of ~191 nm compared to the experimental value of ~226 nm.

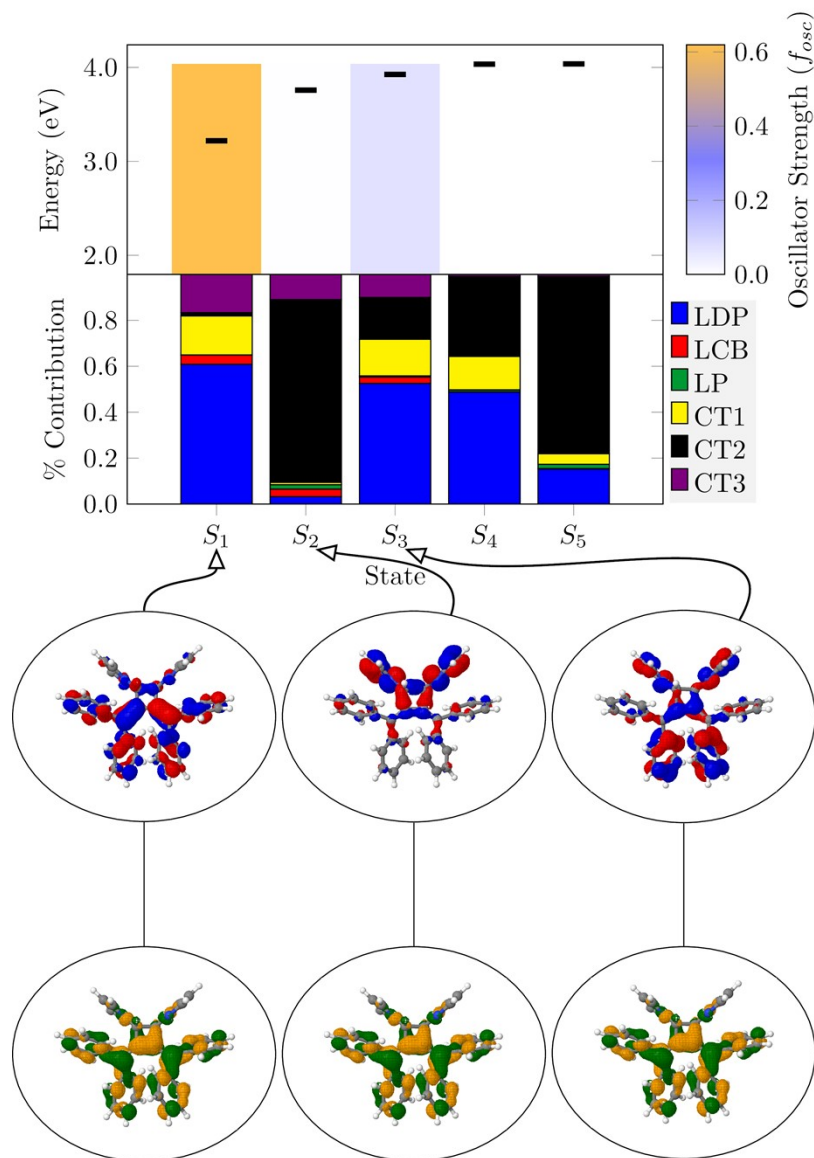

**Figure S17:** Fragment based analysis of excited states ( $S_1$ – $S_5$ ) of CB from TD-DFT/B3LYP/6-31G(D,P) calculation using Theodore program package. The first five excited states for the CB decomposed into contributions from local excitations (L) of ligands diphenylmethylene (LDP), cyclobutane (LCB), pyrazole (LP). Charge transfer (CT) states of cyclobutane to diphenylmethylene (CT1), diphenylmethylene to pyrazole (CT2), cyclobutane to pyrazole (CT3). Top: The excitation energies (thick horizontal bar, in eV) and oscillator strengths (in color) of the electronic states. Middle: Stacked bar chart showing the % contributions of LDP, LCB, LP, CT1, CT2 and CT3 excitations in the electronic states. Bottom: Representative Natural Transition Orbitals (NTOs) and dominant electronic transitions for states  $S_1$ ,  $S_2$  and  $S_3$ .

**Table S9:** The vertical excitation wavelength ( $\lambda$  in nm), oscillator strength ( $f$  in dimensionless), electron transitions and character of the state of CB in solution, vacuum and solid phases.

|          | State          | $\lambda$ (nm) | $f$    | Electron transition       | Character |
|----------|----------------|----------------|--------|---------------------------|-----------|
| Methanol | S <sub>1</sub> | 387            | 0.679  | HOMO $\rightarrow$ LUMO   | LE        |
|          | S <sub>2</sub> | 328            | 0.005  | HOMO-1 $\rightarrow$ LUMO | CT        |
|          | S <sub>3</sub> | 314            | 0.051  | HOMO-2 $\rightarrow$ LUMO | LE        |
|          | S <sub>4</sub> | 308            | 0.001  | HOMO-4 $\rightarrow$ LUMO | CT        |
|          | S <sub>5</sub> | 306            | 0.002  | HOMO-3 $\rightarrow$ LUMO | CT        |
| Vacuum   | S <sub>1</sub> | 385            | 0.619  | HOMO $\rightarrow$ LUMO   | LE        |
|          | S <sub>2</sub> | 330            | 0.003  | HOMO-1 $\rightarrow$ LUMO | CT        |
|          | S <sub>3</sub> | 316            | 0.070  | HOMO-2 $\rightarrow$ LUMO | LE        |
|          | S <sub>4</sub> | 307            | <0.001 | HOMO-4 $\rightarrow$ LUMO | CT        |
|          | S <sub>5</sub> | 307            | 0.005  | HOMO-3 $\rightarrow$ LUMO | CT        |
| Solid    | S <sub>1</sub> | 354            | 0.745  | HOMO $\rightarrow$ LUMO   | LE        |
|          | S <sub>2</sub> | 302            | 0.009  | HOMO-2 $\rightarrow$ LUMO | CT        |
|          | S <sub>3</sub> | 301            | 0.054  | HOMO-1 $\rightarrow$ LUMO | LE        |
|          | S <sub>4</sub> | 296            | 0.002  | HOMO-3 $\rightarrow$ LUMO | CT        |
|          | S <sub>5</sub> | 292            | 0.002  | HOMO-4 $\rightarrow$ LUMO | CT        |

To understand the steady-state spectroscopy in the solid state, we first examined a monomer extracted from the crystal structure. The  $S_1$  state (HOMO  $\rightarrow$  LUMO) appears at 354 nm and is a bright state with an oscillator strength of 0.745 (see Table S9 and Figure S18). Subsequently, we calculated the energies of the first 30 excited states using a series of molecular aggregates dimers, trimers, tetramers, pentamers, and hexamers that constructed from the unit cell of the crystal structure (see Figure S19 and Figure 1b). A total of 15 unique dimers can be generated from the unit cell containing six molecules (see Figure S19b). Analysis of the low-lying excited states of these dimers shows that the character of these states can be adequately described using only the HOMO and LUMO of each monomer (see Table S10 and Figure S20).

When the electronic transition involves the HOMO and LUMO of the same monomer, the state is classified as a locally excited (LE) state. In contrast, if the transition occurs between the HOMO of one monomer and the LUMO of another, the state is identified as a charge-transfer (CT) state. The dimer model yields two LE and two CT states. Depending on the relative orientation and intermolecular distance between the monomers, the excitation energies vary from 354.8 to 379.7 nm. Notably, the oscillator strength of one of the  $S_1$ – $S_4$  states is approximately twice that of the monomer and the remaining states are dark (negligible oscillator strengths).

With increasing aggregate size, the energy of the first excited state, although dark, shows a progressive red shift, whereas the bright state remains near 354 nm. In the pentamer and hexamer models, two bright states are observed: one around  $\sim$ 360 nm with an oscillator strength of 0.2, and another near  $\sim$ 355 nm with a significantly higher oscillator strength of 3.5. For the hexamer, the first excited state appears at 385 nm (See Table S14). Further extension of the molecular assembly in three dimensions is expected to red-shift the first excited state toward  $\sim$ 400 nm. These calculations were performed without incorporating the dielectric constant of the solid state. This model explains the red shift of the electronic absorption in solid CB.

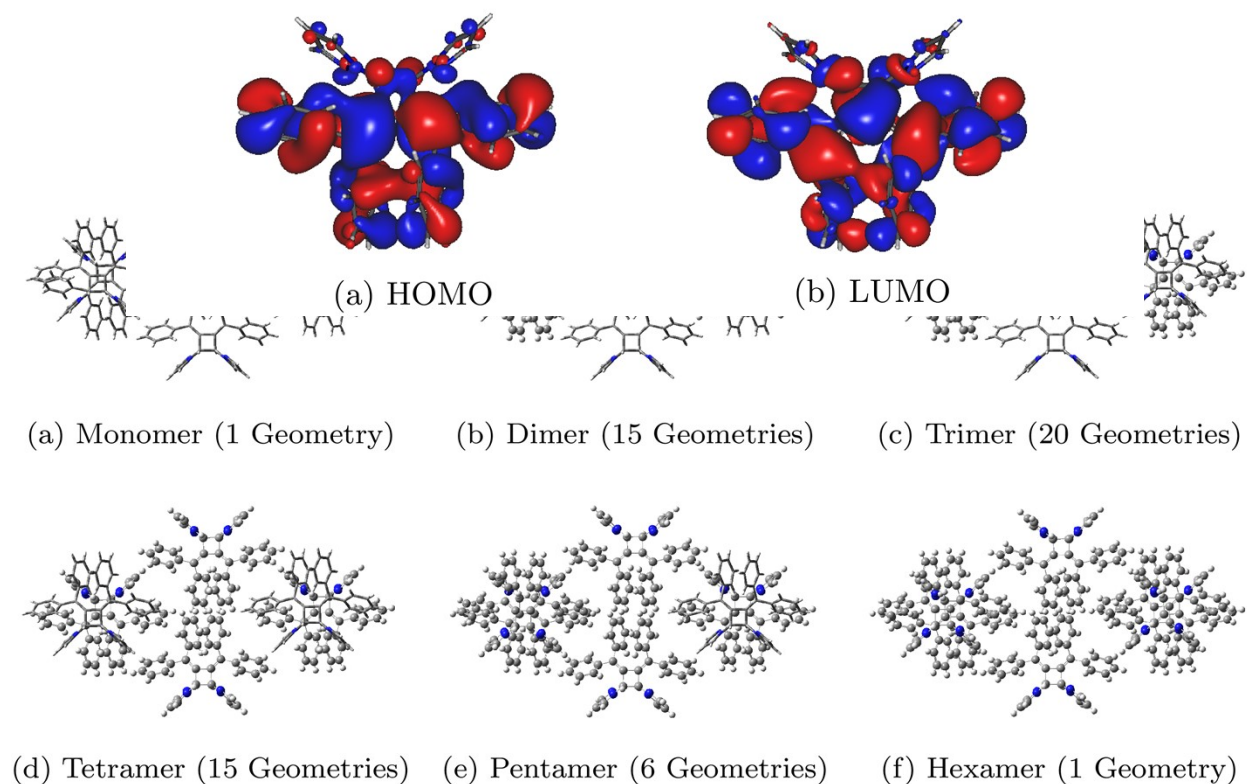

**Figure S18:** The molecular orbitals (a) HOMO and (b) LUMO of monomer extracted from crystal structure.

**Figure S19:** Description of the cluster model employed in the study. Six molecules were extracted from the crystallographic unit cell to construct the aggregates. In panels (a)–(f), two styles of molecular representation are used: a wire-frame model for the molecules that were discarded and a ball-and-stick model for the molecules included in the calculations. (a) Monomer; (b) one representative example from the fifteen possible dimers; (c) one representative example from the twenty possible trimers; (d) tetramer; (e) pentamer; and (f) hexamer.

**Table S10:** Vertical excitation wavelengths ( $\lambda$ , nm), oscillator strengths ( $f$ ), electronic transitions, and corresponding characters for the selected dimer extracted from the unit cell.

| State          | $\lambda$ (nm) | $f$   | Electron transition                                    | Character |
|----------------|----------------|-------|--------------------------------------------------------|-----------|
| S <sub>1</sub> | 355.5          | 1.54  | HOMO $\rightarrow$ LUMO<br>HOMO-1 $\rightarrow$ LUMO+1 | LE        |
| S <sub>2</sub> | 353.6          | >0.01 | HOMO $\rightarrow$ LUMO<br>HOMO-1 $\rightarrow$ LUMO+1 | LE        |
| S <sub>3</sub> | 351.6          | >0.01 | HOMO-1 $\rightarrow$ LUMO                              | CT        |
| S <sub>4</sub> | 351.6          | >0.01 | HOMO $\rightarrow$ LUMO+1                              | CT        |

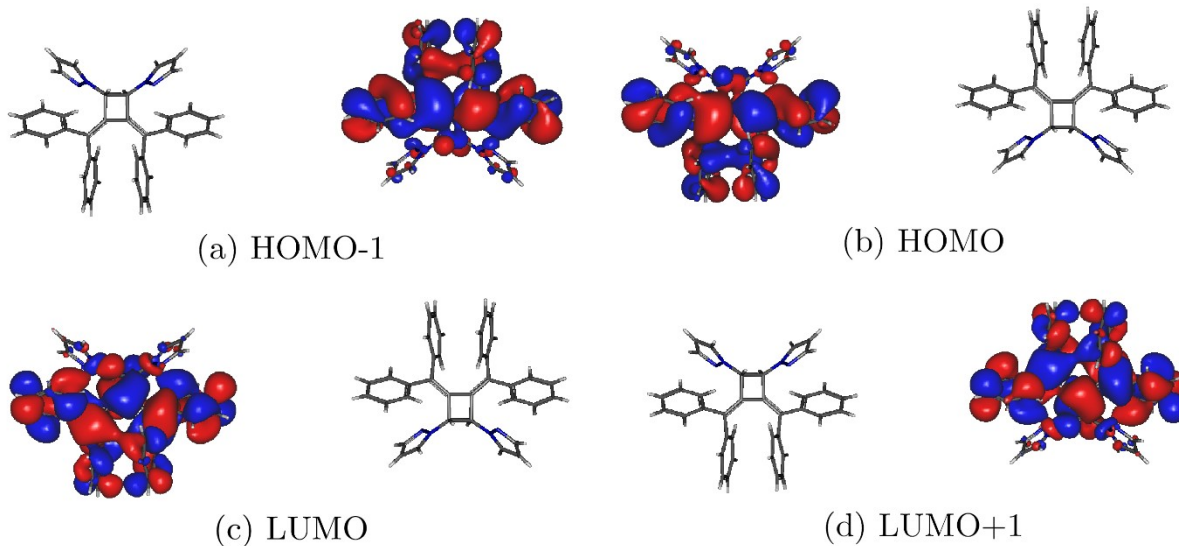

**Figure S20:** Frontier molecular orbitals from HOMO-1 to LUMO+1 of a representative dimer selected from the fifteen possible dimers extracted from the crystal structure.

**Table S11:** Vertical excitation wavelengths ( $\lambda$ , nm), oscillator strengths ( $f$ ), electronic transitions, and corresponding characters for the selected trimer extracted from the unit cell.

| State          | $\lambda$ (nm) | $f$   | Electron transition                                                                   | Character |
|----------------|----------------|-------|---------------------------------------------------------------------------------------|-----------|
| S <sub>1</sub> | 378.1          | >0.01 | HOMO $\rightarrow$ LUMO                                                               | CT        |
| S <sub>2</sub> | 378.1          | >0.01 | HOMO-1 $\rightarrow$ LUMO                                                             | CT        |
| S <sub>3</sub> | 358.2          | 2.38  | HOMO-2 $\rightarrow$ LUMO<br>HOMO-1 $\rightarrow$ LUMO+1<br>HOMO $\rightarrow$ LUMO+2 | LE        |

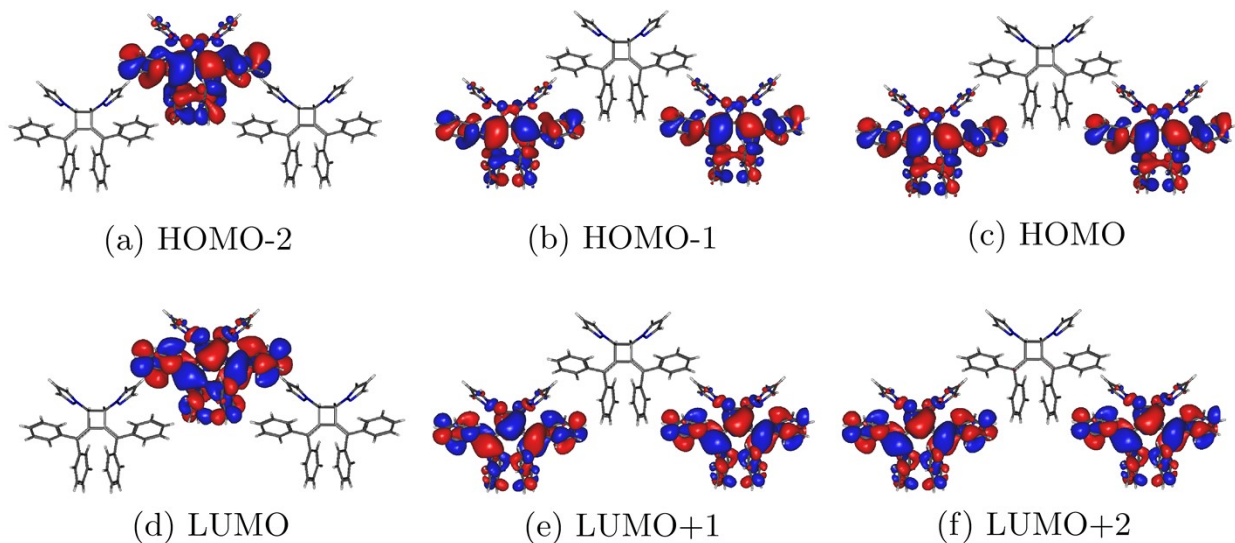

|                |       |       |                                                                                       |    |
|----------------|-------|-------|---------------------------------------------------------------------------------------|----|
| S <sub>4</sub> | 354.3 | >0.01 | HOMO-1 $\rightarrow$ LUMO+2<br>HOMO $\rightarrow$ LUMO+1                              | LE |
| S <sub>5</sub> | 353.7 | 0.07  | HOMO-2 $\rightarrow$ LUMO<br>HOMO-1 $\rightarrow$ LUMO+1<br>HOMO $\rightarrow$ LUMO+2 | LE |
| S <sub>6</sub> | 351.2 | >0.01 | HOMO-1 $\rightarrow$ LUMO+2<br>HOMO $\rightarrow$ LUMO+1                              | LE |
| S <sub>7</sub> | 351.2 | >0.01 | HOMO-1 $\rightarrow$ LUMO+1<br>HOMO $\rightarrow$ LUMO+2                              | LE |
| S <sub>8</sub> | 348.7 | >0.01 | HOMO-2 $\rightarrow$ LUMO+1                                                           | CT |
| S <sub>9</sub> | 348.7 | >0.01 | HOMO-2 $\rightarrow$ LUMO+2                                                           | CT |

**Figure S21:** Frontier molecular orbitals from HOMO-2 to LUMO+2 of a representative trimer selected from the twenty possible trimers extracted from the crystal structure.

**Table S12:** The vertical excitation wavelength ( $\lambda$ , in nm units), oscillator strength ( $f$ , dimensionless), electron transition and character of the selected tetramer from the unit cell.

| State           | $\lambda$ (nm) | $f$   | Electron transition                                      | Character |
|-----------------|----------------|-------|----------------------------------------------------------|-----------|
| S <sub>1</sub>  | 380.8          | >0.01 | HOMO $\rightarrow$ LUMO                                  | CT        |
| S <sub>2</sub>  | 379.1          | >0.01 | HOMO-1 $\rightarrow$ LUMO                                | CT        |
| S <sub>3</sub>  | 377.1          | >0.01 | HOMO-2 $\rightarrow$ LUMO                                | CT        |
| S <sub>4</sub>  | 367.5          | >0.01 | HOMO $\rightarrow$ LUMO+1                                | CT        |
| S <sub>5</sub>  | 362            | >0.01 | HOMO-2 $\rightarrow$ LUMO+3                              | CT        |
| S <sub>6</sub>  | 359.5          | >0.01 | HOMO-1 $\rightarrow$ LUMO+1                              | CT        |
| S <sub>7</sub>  | 359.3          | 1.52  | HOMO-2 $\rightarrow$ LUMO+1<br>HOMO $\rightarrow$ LUMO+3 | LE        |
| S <sub>8</sub>  | 358.3          | 1.5   | HOMO-3 $\rightarrow$ LUMO<br>HOMO-1 $\rightarrow$ LUMO+2 | LE        |
| S <sub>9</sub>  | 356.8          | >0.01 | HOMO-2 $\rightarrow$ LUMO+2                              | CT        |
| S <sub>10</sub> | 354.2          | 0.08  | HOMO-1 $\rightarrow$ LUMO+2                              | LE        |
| S <sub>11</sub> | 352.5          | >0.01 | HOMO $\rightarrow$ LUMO+2                                | CT        |
| S <sub>12</sub> | 351            | 0.11  | HOMO-2 $\rightarrow$ LUMO+1<br>HOMO $\rightarrow$ LUMO+4 | LE        |

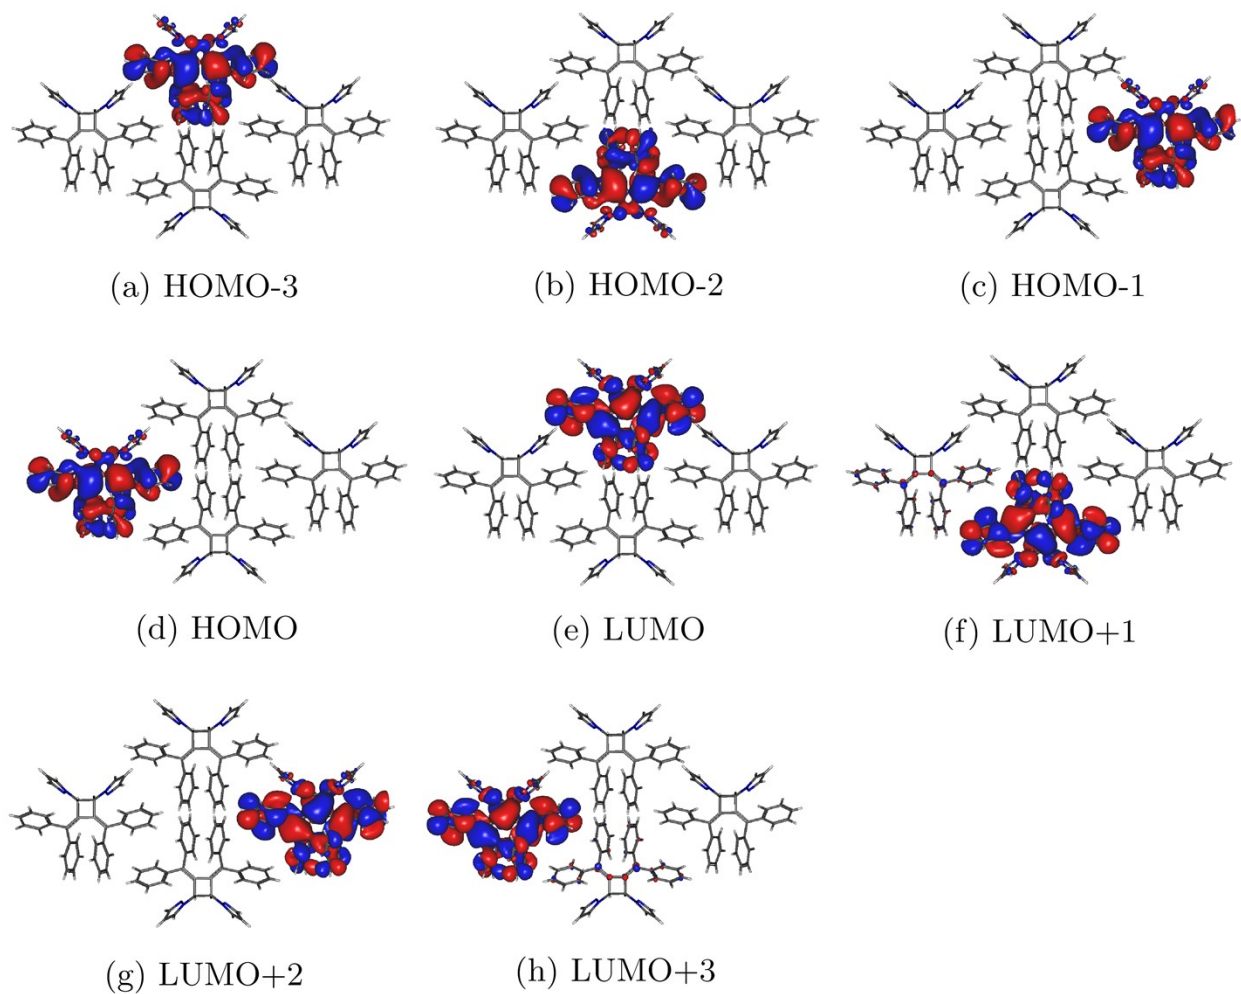

**Figure S22:** Frontier molecular orbitals from HOMO-3 to LUMO+3 of a representative tetramer selected from the fifteen possible tetramers extracted from the crystal structure.

**Table S13:** The vertical excitation wavelength ( $\lambda$ , in nm units), oscillator strength ( $f$ , dimensionless), electron transition and character of the selected pentamer from the unit cell.

| State           | $\lambda$ (nm) | $f$   | Electron transition                                                                     | Character |
|-----------------|----------------|-------|-----------------------------------------------------------------------------------------|-----------|
| S <sub>1</sub>  | 387.3          | >0.01 | HOMO $\rightarrow$ LUMO                                                                 | CT        |
| S <sub>2</sub>  | 381.4          | >0.01 | HOMO-1 $\rightarrow$ LUMO                                                               | LE        |
| S <sub>3</sub>  | 380.8          | >0.01 | HOMO $\rightarrow$ LUMO+3                                                               | LE        |
| S <sub>4</sub>  | 379.3          | >0.01 | HOMO-2 $\rightarrow$ LUMO                                                               | CT        |
| S <sub>5</sub>  | 378.9          | >0.01 | HOMO-1 $\rightarrow$ LUMO+4                                                             | LE        |
| S <sub>6</sub>  | 378.8          | >0.01 | HOMO $\rightarrow$ LUMO+1                                                               | CT        |
| S <sub>7</sub>  | 376.1          | >0.01 | HOMO-2 $\rightarrow$ LUMO+1                                                             | CT        |
| S <sub>8</sub>  | 371.9          | >0.01 | HOMO-3 $\rightarrow$ LUMO                                                               | CT        |
| S <sub>9</sub>  | 364.5          | >0.01 | HOMO-2 $\rightarrow$ LUMO+1                                                             | CT        |
| S <sub>10</sub> | 363.6          | 0.20  | HOMO $\rightarrow$ LUMO+4<br>HOMO-1 $\rightarrow$ LUMO+3                                | LE        |
| S <sub>11</sub> | 358.8          | >0.01 | HOMO-4 $\rightarrow$ LUMO<br>HOMO-3 $\rightarrow$ LUMO+1                                | LE        |
| S <sub>12</sub> | 358.1          | >0.01 | HOMO-1 $\rightarrow$ LUMO+2<br>HOMO-2 $\rightarrow$ LUMO+2                              | CT        |
| S <sub>13</sub> | 356.5          | 3.45  | HOMO-3 $\rightarrow$ LUMO+1<br>HOMO-1 $\rightarrow$ LUMO+3<br>HOMO-4 $\rightarrow$ LUMO | LE        |
| S <sub>14</sub> | 355.7          | >0.01 | HOMO-1 $\rightarrow$ LUMO+2                                                             | CT        |
| S <sub>15</sub> | 353.9          | 0.03  | HOMO-2 $\rightarrow$ LUMO+2                                                             | LE        |

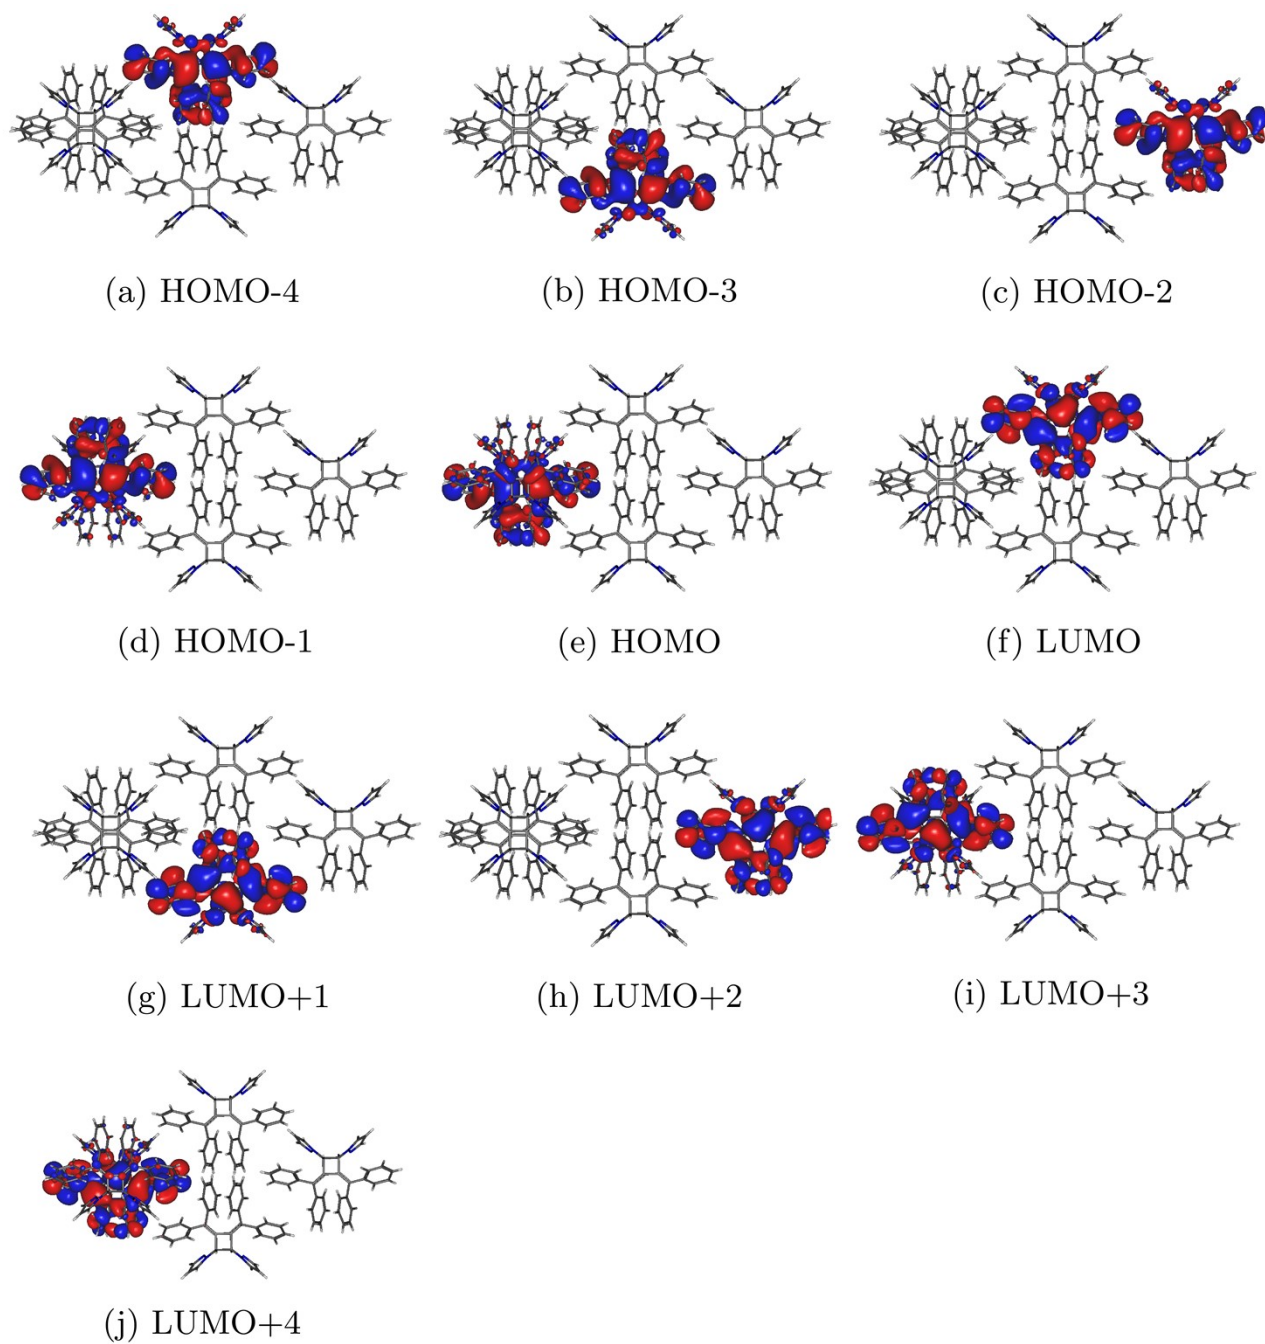

**Figure S23:** Frontier molecular orbitals from HOMO-4 to LUMO+4 of a representative pentamer selected from the six possible pentamers extracted from the crystal structure.

**Table S14:** The vertical excitation wavelength ( $\lambda$ , in nm units), oscillator strength ( $f$ , dimensionless), electron transition and character of the selected hexamer from the unit cell.

| State           | $\lambda$ (nm) | $f$   | Electron transition                                                                                                    | Character |
|-----------------|----------------|-------|------------------------------------------------------------------------------------------------------------------------|-----------|
| S <sub>1</sub>  | 385.2          | >0.01 | HOMO $\rightarrow$ LUMO<br>HOMO-1 $\rightarrow$ LUMO+1                                                                 |           |
| S <sub>2</sub>  | 385.2          | >0.01 | HOMO $\rightarrow$ LUMO+1<br>HOMO-1 $\rightarrow$ LUMO                                                                 |           |
| S <sub>3</sub>  | 383.1          | >0.01 | HOMO $\rightarrow$ LUMO+1<br>HOMO-1 $\rightarrow$ LUMO                                                                 |           |
| S <sub>4</sub>  | 383.1          | >0.01 | HOMO $\rightarrow$ LUMO<br>HOMO-1 $\rightarrow$ LUMO+1                                                                 |           |
| S <sub>5</sub>  | 382.3          | >0.01 | HOMO-2 $\rightarrow$ LUMO+1<br>HOMO-3 $\rightarrow$ LUMO+2                                                             |           |
| S <sub>6</sub>  | 382.3          | >0.01 | HOMO-2 $\rightarrow$ LUMO+2<br>HOMO-3 $\rightarrow$ LUMO+1                                                             |           |
| S <sub>7</sub>  | 380.7          | >0.01 | HOMO-1 $\rightarrow$ LUMO+1<br>HOMO $\rightarrow$ LUMO+2                                                               |           |
| S <sub>8</sub>  | 380.7          | >0.01 | HOMO-1 $\rightarrow$ LUMO+2<br>HOMO $\rightarrow$ LUMO+1                                                               |           |
| S <sub>9</sub>  | 378.8          | >0.01 | HOMO-2 $\rightarrow$ LUMO+4<br>HOMO-3 $\rightarrow$ LUMO+3                                                             |           |
| S <sub>10</sub> | 378.8          | >0.01 | HOMO-2 $\rightarrow$ LUMO+3<br>HOMO-3 $\rightarrow$ LUMO+4                                                             |           |
| S <sub>11</sub> | 377.3          | >0.01 | HOMO-2 $\rightarrow$ LUMO+1<br>HOMO-3 $\rightarrow$ LUMO                                                               |           |
| S <sub>12</sub> | 377.3          | >0.01 | HOMO-2 $\rightarrow$ LUMO<br>HOMO-3 $\rightarrow$ LUMO+1<br>HOMO $\rightarrow$ LUMO+4                                  |           |
| S <sub>13</sub> | 364.1          | 0.54  | HOMO-1 $\rightarrow$ LUMO+5<br>HOMO-2 $\rightarrow$ LUMO+2<br>HOMO-3 $\rightarrow$ LUMO+3<br>HOMO $\rightarrow$ LUMO+5 | LE        |
| S <sub>14</sub> | 363.3          | >0.01 | HOMO-1 $\rightarrow$ LUMO+4<br>HOMO-2 $\rightarrow$ LUMO+3<br>HOMO-3 $\rightarrow$ LUMO+2                              |           |
| S <sub>15</sub> | 362.4          | >0.01 | HOMO-4 $\rightarrow$ LUMO<br>HOMO-5 $\rightarrow$ LUMO+1                                                               |           |
| S <sub>16</sub> | 362.4          | >0.01 | HOMO-4 $\rightarrow$ LUMO+1<br>HOMO-5 $\rightarrow$ LUMO                                                               |           |
| S <sub>17</sub> | 359.6          | >0.01 | HOMO-4 $\rightarrow$ LUMO+1<br>HOMO-5 $\rightarrow$ LUMO<br>HOMO-4 $\rightarrow$ LUMO                                  |           |
| S <sub>18</sub> | 356.9          | 3.77  | HOMO-5 $\rightarrow$ LUMO+1<br>HOMO-3 $\rightarrow$ LUMO+2<br>HOMO-2 $\rightarrow$ LUMO+3<br>HOMO $\rightarrow$ LUMO+3 | LE        |
| S <sub>19</sub> | 352.5          | >0.01 | HOMO $\rightarrow$ LUMO+2<br>HOMO-1 $\rightarrow$ LUMO+2<br>HOMO-1 $\rightarrow$ LUMO+3                                |           |

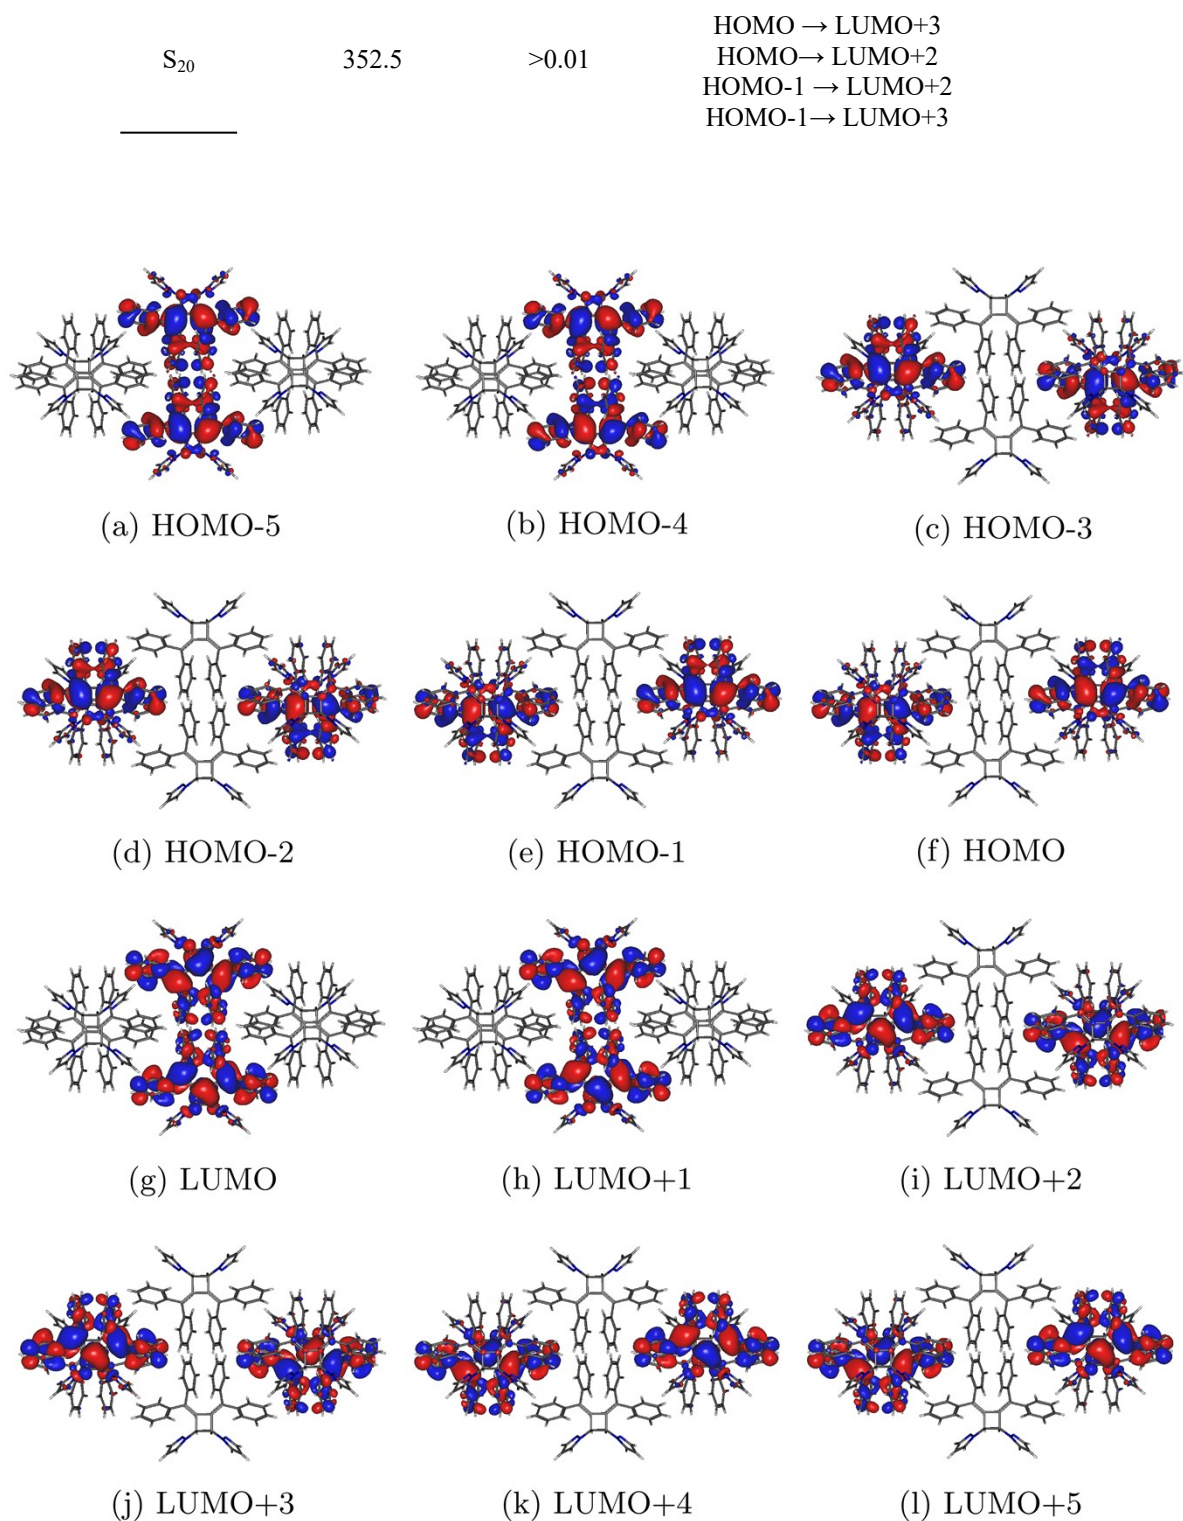

**Figure S24** : Frontier molecular orbitals from HOMO

-5 to LUMO+5 of a representative hexamer extracted from the crystal structure.

**Table S15:** Excited state energies employing a cluster model (mono, di, tri, tetra, penta and hexamer) from the crystal structure.

|          | No of geometries studied | Lowest State energy (nm) | Standard Deviation (nm) | Energy of Bright State (nm) | Oscillator strength |
|----------|--------------------------|--------------------------|-------------------------|-----------------------------|---------------------|
| Monomer  | 1                        | 354.4                    | -                       | 354                         | 0.74                |
| Dimer    | 15                       | 354.8-379.7              | 9.01                    | 355                         | 1.54                |
| Trimer   | 20                       | 364.8-381.2              | 5.12                    | 358                         | 2.38                |
| Tetramer | 11                       | 373.2-383.5              | 2.76                    | 360                         | 1.52                |
| Pentamer | 4                        | 382.2-387.3              | 2.41                    | 363                         | 0.20                |
| Hexamer  | 1                        | 385.2                    | -                       | 364                         | 0.54                |

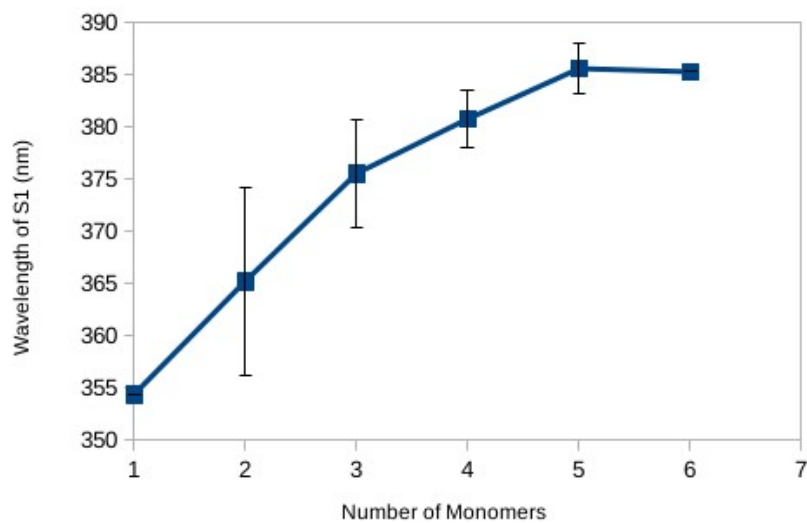

**Figure S25:** The average excitation energy of the first electronic state ( $S_1$ ) along with the standard deviation for mono, di, tri, tetra, penta and hexamers obtained from the crystal structure.

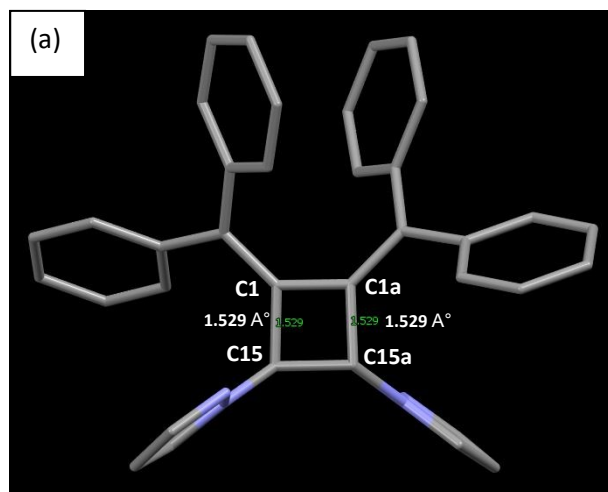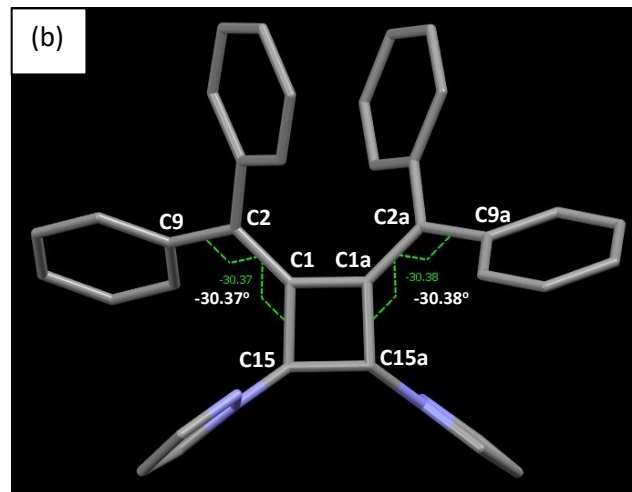

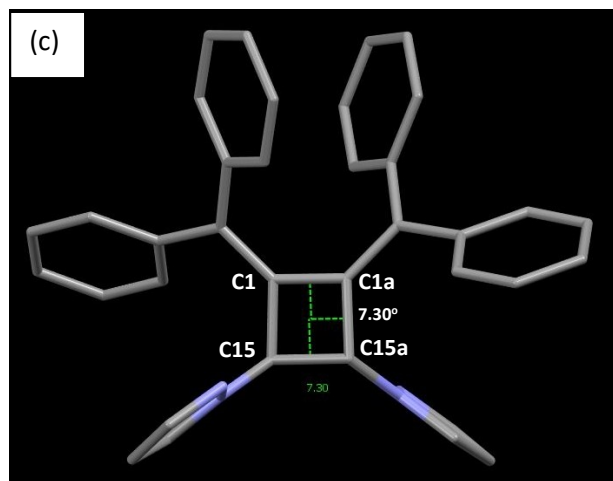

**Figure S26:** Excited state S1 optimized geometry bond lengths (C1-C15 and C1a-C15a), torsion angles (C15-C1-C2-C9, C15C1a-C2a-C9a) and (C1-C1a-C15a-C15) are shown in the figures (a), (b) and (c) using mercury software from CCDC.

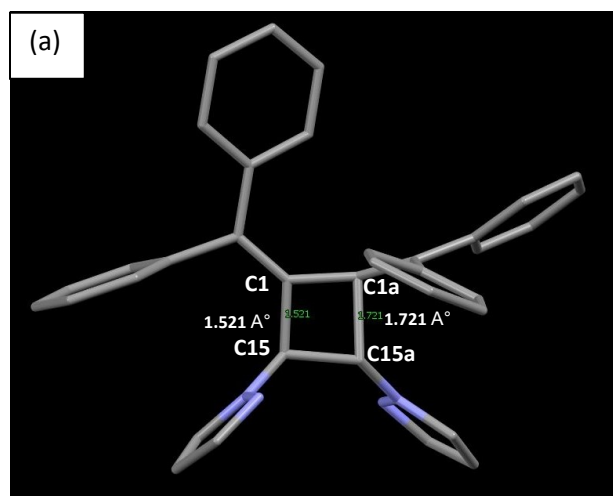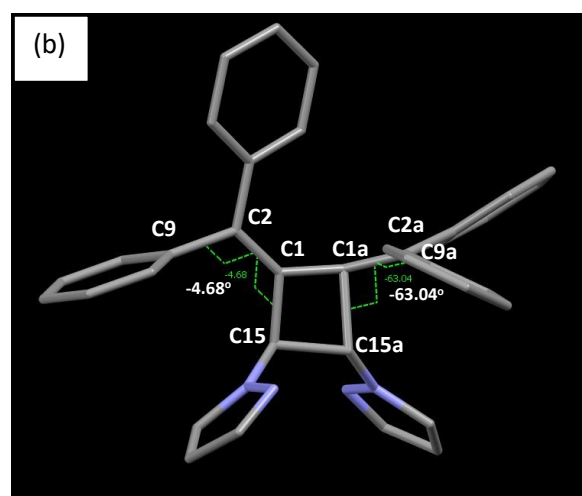

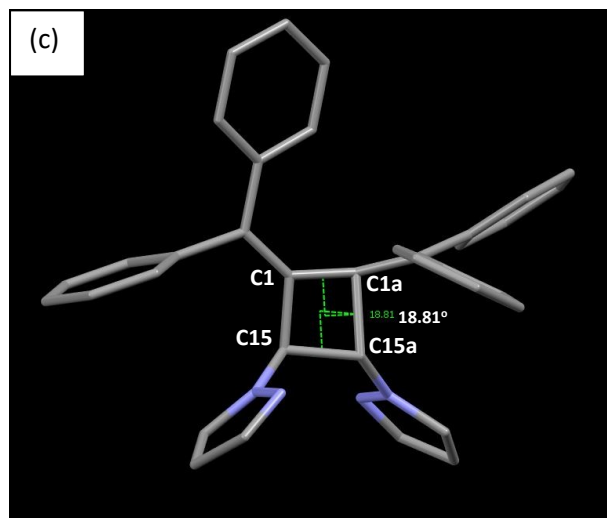

**Figure S27:** CI state geometry bond lengths bond lengths (C1-C15 and C1a-C15a), torsion angles (C15-C1-C2-C9, C15-C1a-C2a-C9a) and (C1-C1a-C15a-C15) are shown in the figures (a), (b) and (c) using mercury software from CCDC.

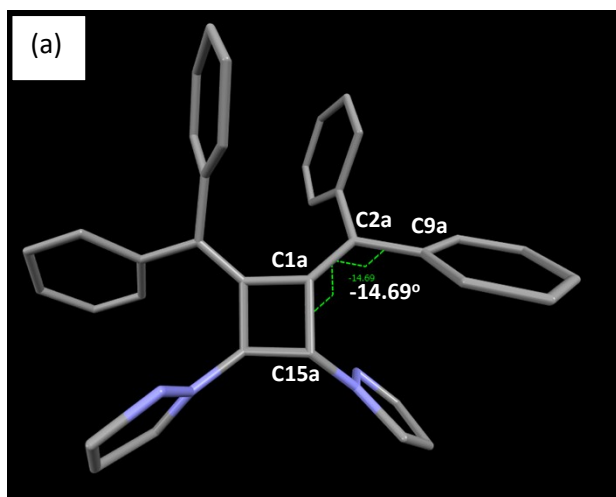

**Figure S28:** Geometry from the un-optimized crystal structure showing a torsion angles (C15-C1a-C2a-C9a) using mercury software from CCDC.

## 10. References:

- 1 M. E. Zandler and F. D'Souza, *Comptes Rendus Chim.*, 2006, **9**, 960–981.
- 2 M. Orio, D. A. Pantazis and F. Neese, *Photosynth. Res.*, 2009, **102**, 443–453.
- 3 Z. Chen and J. Yang, *Front. Phys. China*, 2006, **1**, 339–343.
- 4 J. Wang and B. Durbeej, *J. Comput. Chem.*, 2020, **41**, 1718–1729.
- 5 D. F. Tegegn, H. Z. Belachew and A. O. Salau, *Sci. Rep.*, 2024, **14**, 8146.
- 6 R. El Mouhi, S. El Khattabi, M. Hachi, A. Fitri, A. T. Benjelloun, M. Benzakour, M. Mcharfi and M. Bouachrine, *Res. Chem. Intermed.*, 2019, **45**, 1327–1340.
- 7 A. Jendoubi, Y. Arfaoui, J. Palaudoux, M. M. Al-Mogren and M. Hochlaf, *J. Comput. Chem.*, 2024, **45**, 563–573.
- 8 S. H. El-Demerdash, S. A. Halim, A. M. El-Nahas and A. B. El-Meligy, *Sci. Rep.*, 2023, **13**, 15626.
- 9 J. Tirado-Rives and W. L. Jorgensen, *J. Chem. Theory Comput.*, 2008, **4**, 297–306.
- 10 M. Aydin, *Density Funct. Theory-Recent Adv. New Perspect. Appl.* 2019
- 11 R. D'Cunha and T. D. Crawford, *J. Phys. Chem. A*, 2021, **125**, 3095–3108.
- 12 J. Hernández-Lima, K. Ramírez-Gualito, B. Quiroz-García, A. L. Silva-Portillo, E. Carrillo-Nava and F. Cortés-Guzmán, *Front. Chem.*, 2022, **10**, 1012769.
- 13 D. F. S. Machado, T. O. Lopes, I. T. Lima, D. A. da Silva Filho and H. C. B. de Oliveira, *J. Phys. Chem. C*, 2016, **120**, 17660–17669.
- 14 A. V Marenich, C. J. Cramer and D. G. Truhlar, *J. Phys. Chem. B*, 2009, **113**, 6378–6396.
- 15 Y. Takano and K. N. Houk, *J. Chem. Theory Comput.*, 2005, **1**, 70–77.
- 16 L. Xu, Towards Improving The Accuracy of Implicit Solvent Models and Understanding Electrostatic Catalysis in Complex Solvent Environment. 2022.
- 17 F. Neese, F. Wennmohs, U. Becker and C. Riplinger, *J. Chem. Phys.*, 2020, **152**, 224108
- 18 F. Neese, *Faraday Discuss.*, 2024, **254**, 295–314.
- 19 F. Neese, *Wiley Interdiscip. Rev. Comput. Mol. Sci.*, 2012, **2**, 73–78.
- 20 R. Guareschi and C. Filippi, *J. Chem. Theory Comput.*, 2013, **9**, 5513–5525.
- 21 F. Plasser, *J. Chem. Phys.* 2020, **152**, 084108.
